# Supplementary material for: Complexation of halide ions to tyrosine: role of non-covalent interactions evidenced by IRMPD spectroscopy
Source: Royal Society of Chemistry journal article supplement (doi:10.1039/c7cp06657k), 2018-01-01
Supplement: c7cp06657k1.pdf [file c7cp06657k1.pdf]

**Supporting Information for:**

**Complexation of halide ions to tyrosine: role of non-covalent interactions evidenced by IRMPD spectroscopy**

Davide Corinti,<sup>a</sup> Barbara Gregori,<sup>a</sup> Leonardo Guidoni,<sup>b</sup> Debora Scuderi,<sup>c</sup> Terry McMahon,<sup>d</sup> Barbara Chiavarino,<sup>a</sup> Simonetta Fornarini,<sup>a</sup> Maria Elisa Crestoni<sup>a,\*</sup>

Corresponding author:

\*Tel: +39 06 4991 3596. Fax: +39 06 4991 3602.

Email: [mariaelisa.crestoni@uniroma1.it](mailto:mariaelisa.crestoni@uniroma1.it)

**Contents :**

**Computational Details** Any additional computational detail and material (xyz files of computed structures, calculated vibrational frequencies for all structures, etc.) is available from the authors upon request.

**Fig. S1** Negative ESI mass spectra recorded upon selection of halide L-tyrosine adducts, a) [Tyr+Cl]<sup>-</sup> (*m/z* 216/218); b) [Tyr+Br]<sup>-</sup> (*m/z* 260/262); and c) [Tyr+I]<sup>-</sup> (*m/z* 308), upon irradiation with CLIO FEL light on resonance at 1505, 1297, 1177 cm<sup>-1</sup>, respectively. Spectra recorded in a Bruker Esquire Paul ion trap mass spectrometer (Bruker, Esquire 3000+).

**Fig. S2** Negative ESI mass spectra recorded upon selection of halide 3-NO<sub>2</sub>-L-tyrosine adducts, a) [nitroTyr+Cl]<sup>-</sup> (*m/z* 261/263); b) [nitroTyr+Br]<sup>-</sup> (*m/z* 305/307); and c) [nitroTyr+I]<sup>-</sup> (*m/z* 353), upon irradiation with CLIO FEL light on resonance at 1477, 1325, 1737 cm<sup>-1</sup>, respectively. Spectra recorded in a Bruker Esquire Paul ion trap mass spectrometer (Bruker, Esquire 3000+).

**Fig. S3** Experimental IRMPD signals of [Tyr+Cl]<sup>-</sup> recorded in the parent ion channel depletion ([Tyr+Cl]<sup>-</sup>, blue profile), the fragment ion channel ([Tyr-H]<sup>-</sup>, green profile), and the IRMPD efficiency (*R*, red profile) in the 950-1950 cm<sup>-1</sup> range. *R* scale is on the right vertical axis and ion abundances (in arbitrary units) are on the left vertical axis.

**Fig. S4** Experimental IRMPD spectrum of [Tyr+Cl]<sup>-</sup> (green profile) in the 2800-3800 cm<sup>-1</sup> range. The blue dashed profile shows the laser power as a function of the IR wavenumber.

**Fig. S5** Experimental IRMPD spectrum of [Tyr+Br]<sup>-</sup> (brown profile) in the 2800-3800 cm<sup>-1</sup> range. The blue dashed profile shows the laser power as a function of the IR wavenumber.

**Fig. S6** Optimized minimum energy structures for selected isomers (**TCl\_pla2**, **TCl\_phe3**, **TCl\_zw2**, and **TCl\_O1**) of [Tyr+Cl]<sup>-</sup>. Relative enthalpies and relative free energies (bracketed) at the B3LYP/6-311++G(d,p) (in red), B3LYP-D3/6-311++G(d,p) (in blue) and MP2//B3LYP/6-311++G(d,p) (in black) levels are provided at 298 K in kJ mol<sup>-1</sup>. Thermodynamic data are relative to the calculated energies of the most stable isomer presented in Fig. 2 (**TCl\_pla1**).

**Fig. S7** Optimized minimum energy structures for selected isomers (**TBr\_phe1**, **TBr\_pla1**, **TBr\_ter1**, **TBr\_ter2**, **TBr\_zw1**, and **TBr\_zw2**) of [Tyr+Br]<sup>-</sup>. Relative enthalpies and relative free energies (bracketed) at the B3LYP/6-311++G(d,p) (in red), B3LYP-D3/6-311++G(d,p) (in blue) and MP2//B3LYP/6-311++G(d,p) (in black) levels are provided at 298 K in kJ mol<sup>-1</sup>.

**Fig. S8** Optimized minimum energy structures for selected isomers (**TI\_phe1**, **TI\_pla1**, **TI\_ter1**, **TI\_ter2**, **TI\_zw1**, and **TI\_zw2**) of [Tyr+I]<sup>-</sup>. Relative enthalpies and relative free energies (bracketed) at the B3LYP/6-311++G(d,p) (in red), B3LYP-D3/6-311++G(d,p) (in blue) and MP2//B3LYP/6-311++G(d,p) (in black) levels are provided at 298 K in kJ mol<sup>-1</sup>.

**Fig. S9** Optimized minimum energy structures for selected isomers (**nTCl\_ter2**, **nTCl\_ter3**, **nTCl\_pla3**, **nTCl\_ter4**, **nTCl\_zw2**, **nTCl\_ring2**, **nTCl\_O1**) of [nitroTyr+Cl]<sup>-</sup>. Relative enthalpies and relative free energies (bracketed) at the B3LYP/6-311++G(d,p) (in red), B3LYP-D3/6-311++G(d,p) (in blue) and MP2//B3LYP/6-311++G(d,p) (in black) levels are provided at 298 K in kJ mol<sup>-1</sup>. Thermodynamic data are relative to the calculated energies of the most stable isomer presented in Fig. 3 (**nTCl\_pla1**).

**Fig. S10** Optimized geometry deriving from an initial structure whereby HCl is acting as hydrogen bond donor towards both phenoxide oxygen and an oxygen atom of the nitro group. This species (**ST-1**) is not a minimum being characterized by an imaginary frequency. Relative enthalpies and relative free energies (bracketed) at the B3LYP/6-311++G(d,p) (in red), and B3LYP-D3/6-311++G(d,p) (in blue) levels are provided at 298 K in kJ mol<sup>-1</sup>.

**Fig. S11** Optimized minimum energy structures for selected isomers (**nTBr\_pla1**, **nTBr\_ter1**, **nTBr\_pla2**, **nTBr\_ring1**, **nTBr\_ter2**, **nTBr\_phe1**, **nTBr\_zw1**, **nTBr\_zw2**) of [nitroTyr+Br]<sup>-</sup>. Relative enthalpies and relative free energies (bracketed) at the B3LYP/6-311++G(d,p) (in red), B3LYP-D3/6-311++G(d,p) (in blue) and MP2//B3LYP/6-311++G(d,p) (in black) levels are provided at 298 K in kJ mol<sup>-1</sup>.

**Fig. S12** Optimized minimum energy structures for selected isomers (**nTI\_pla1**, **nTI\_ter1**, **nTI\_pla2**, **nTI\_ring1**, **nTI\_ter2**, **nTI\_phe1**, **nTI\_zw1**, **nTI\_zw2**) of [nitroTyr+I]<sup>-</sup>. Relative enthalpies and relative free energies (bracketed) at the B3LYP/6-311++G(d,p) (in red), B3LYP-D3/6-311++G(d,p) (in blue) and MP2//B3LYP/6-311++G(d,p) (in black) levels are provided at 298 K in kJ mol<sup>-1</sup>.

**Fig. S13** Experimental IRMPD spectra of [Tyr+Cl]<sup>-</sup> (green profile) and [Tyr+Br]<sup>-</sup> (brown profile) in the NH/OH stretch range compared with IR spectra [km mol<sup>-1</sup>] for **TCl\_pla1**, **TCl\_phe1**, **TCl\_ter1**, **TCl\_ter2**, **TCl\_zw1** and **TBr\_phe1**, **TBr\_pla1**, **TBr\_ter1**, **TBr\_ter2**, **TBr\_zw1** structures obtained at the B3LYP/6-311++G(d,p) level of theory and scaled by a factor of 0.955. The pale profiles report the experimental [Tyr+Cl]<sup>-</sup> (pale green) and [Tyr+Br]<sup>-</sup> (pale brown) spectra.

**Fig. S14** Experimental IRMPD spectra of: [Tyr+Cl]<sup>-</sup> (green profile, panel A) compared with IR spectra [km mol<sup>-1</sup>] for **TCl\_phe2**, **TCl\_pla2**, **TCl\_phe3**, **TCl\_zw2** structures; [Tyr+Br]<sup>-</sup> (brown profile, panel B) compared with IR spectra [km mol<sup>-1</sup>] for **TBr\_zw2**; [Tyr+I]<sup>-</sup> (purple profile, panel C) compared with IR spectra [km mol<sup>-1</sup>] for **TI\_zw2**. Theoretical vibrational modes were obtained at the B3LYP/6-311++G(d,p) level of theory and scaled by a factor of 0.978.

**Fig. S15** Averaged spectrum of [Tyr+Cl]<sup>-</sup> computed from the calculated Boltzmann populations of **TCl\_pla1**, **TCl\_phe1** and **TCl\_ter1** obtained from single-point free energy calculations at MP2//B3LYP/6-311++G(d,p) level. The experimental spectrum (green profile) is also shown to enable comparison.

**Fig. S16** Experimental IRMPD spectrum (green profile) of chloride-bound 3-NO<sub>2</sub>-tyrosine adduct, [nitroTyr+Cl]<sup>-</sup>, compared with IR spectra [km mol<sup>-1</sup>] for **nTCl\_pla2**, **nTCl\_ter2**, **nTCl\_ter3**, **nTCl\_pla3**, **nTCl\_ter4**, **nTCl\_zw2**, **nTCl\_ring2**, **nTCl\_O1** structures obtained at the B3LYP/6-311++G(d,p) level of theory and scaled by a factor of 0.978.

**Fig. S17** Experimental IRMPD spectra of: [nitroTyr+Br]<sup>-</sup> (brown profile, panel A) compared with IR spectra [km mol<sup>-1</sup>] for **nTBr\_pla1**, **nTBr\_ter1**, **nTBr\_ring1** and **nTBr\_ter2** structures; [nitroTyr+I]<sup>-</sup> (purple profile, panel B) compared with IR spectra [km mol<sup>-1</sup>] for **nTI\_pla1**, **nTI\_ter1**, **nTI\_ring1** and **nTI\_ter2** structures. Theoretical vibrational modes were obtained at the B3LYP/6-311++G(d,p) level of theory and scaled by a factor of 0.978. Relative enthalpies and relative free energies (bracketed) at the B3LYP/6-311++G(d,p) (in red), B3LYP-D3/6-311++G(d,p) (in blue) and MP2//B3LYP/6-311++G(d,p) (in black) levels are provided at 298 K in kJ mol<sup>-1</sup>.

**Fig. S18** Experimental IRMPD spectra of: [nitroTyr+Br]<sup>-</sup> (brown profile, panel A) compared with IR spectra [km mol<sup>-1</sup>] for **nTBr\_pla2**, **nTBr\_phe1**, **nTBr\_zw1** and **nTBr\_zw2** structures; [nitroTyr+I]<sup>-</sup> (purple profile, panel B) compared with IR spectra [km mol<sup>-1</sup>] for **nTI\_pla2**, **nTI\_phe1**, **nTI\_zw1** and **nTI\_zw2** structures. Theoretical vibrational modes were obtained at the B3LYP/6-311++G(d,p) level of theory and scaled by a factor of 0.978.

**Table S1** Calculated energies (kJ mol<sup>-1</sup>) at the B3LYP/6-311++G\*\* level for the reaction: [(nitro)Tyr+X]<sup>-</sup> → (nitro)Tyr + X<sup>-</sup> (X = Cl, Br, I).

**Table S2** Thermodynamic data (kJ mol<sup>-1</sup>) for the most stable structures of [Tyr+X]<sup>-</sup> (X = Cl, Br, I) adducts calculated at different levels of theory.

**TABLE S3** Selected dihedral angles (in Degrees) of the lowest energy structures of [Tyr+X]<sup>-</sup> (X = Cl, Br, I) adducts, calculated at the B3LYP/6-311++G(d,p) level of theory.

**Table S4** Thermodynamic data (kJ mol<sup>-1</sup>) for the most stable structures of [nitroTyr+X]<sup>-</sup> (X = Cl, Br, I) adducts calculated at different levels of theory.

**TABLE S5** Selected dihedral angles (in Degrees) of the lowest energy structures of [nitroTyr+X]<sup>-</sup> (X = Cl, Br, I) adducts, calculated at the B3LYP/6-311++G(d,p) level of theory.

**Table S6** Experimental IRMPD resonances and calculated (at B3LYP/6-311++G(d,p) level of theory) vibrational frequencies for the low-lying isomers of [Tyr+X]<sup>-</sup> (X = Cl, Br, I) adducts.

**Table S7** Experimental IRMPD resonances and calculated (at B3LYP/6-311++G(d,p) level of theory) vibrational frequencies for the low-lying isomers of [nitroTyr+X]<sup>-</sup> (X = Cl, Br, I) adducts.

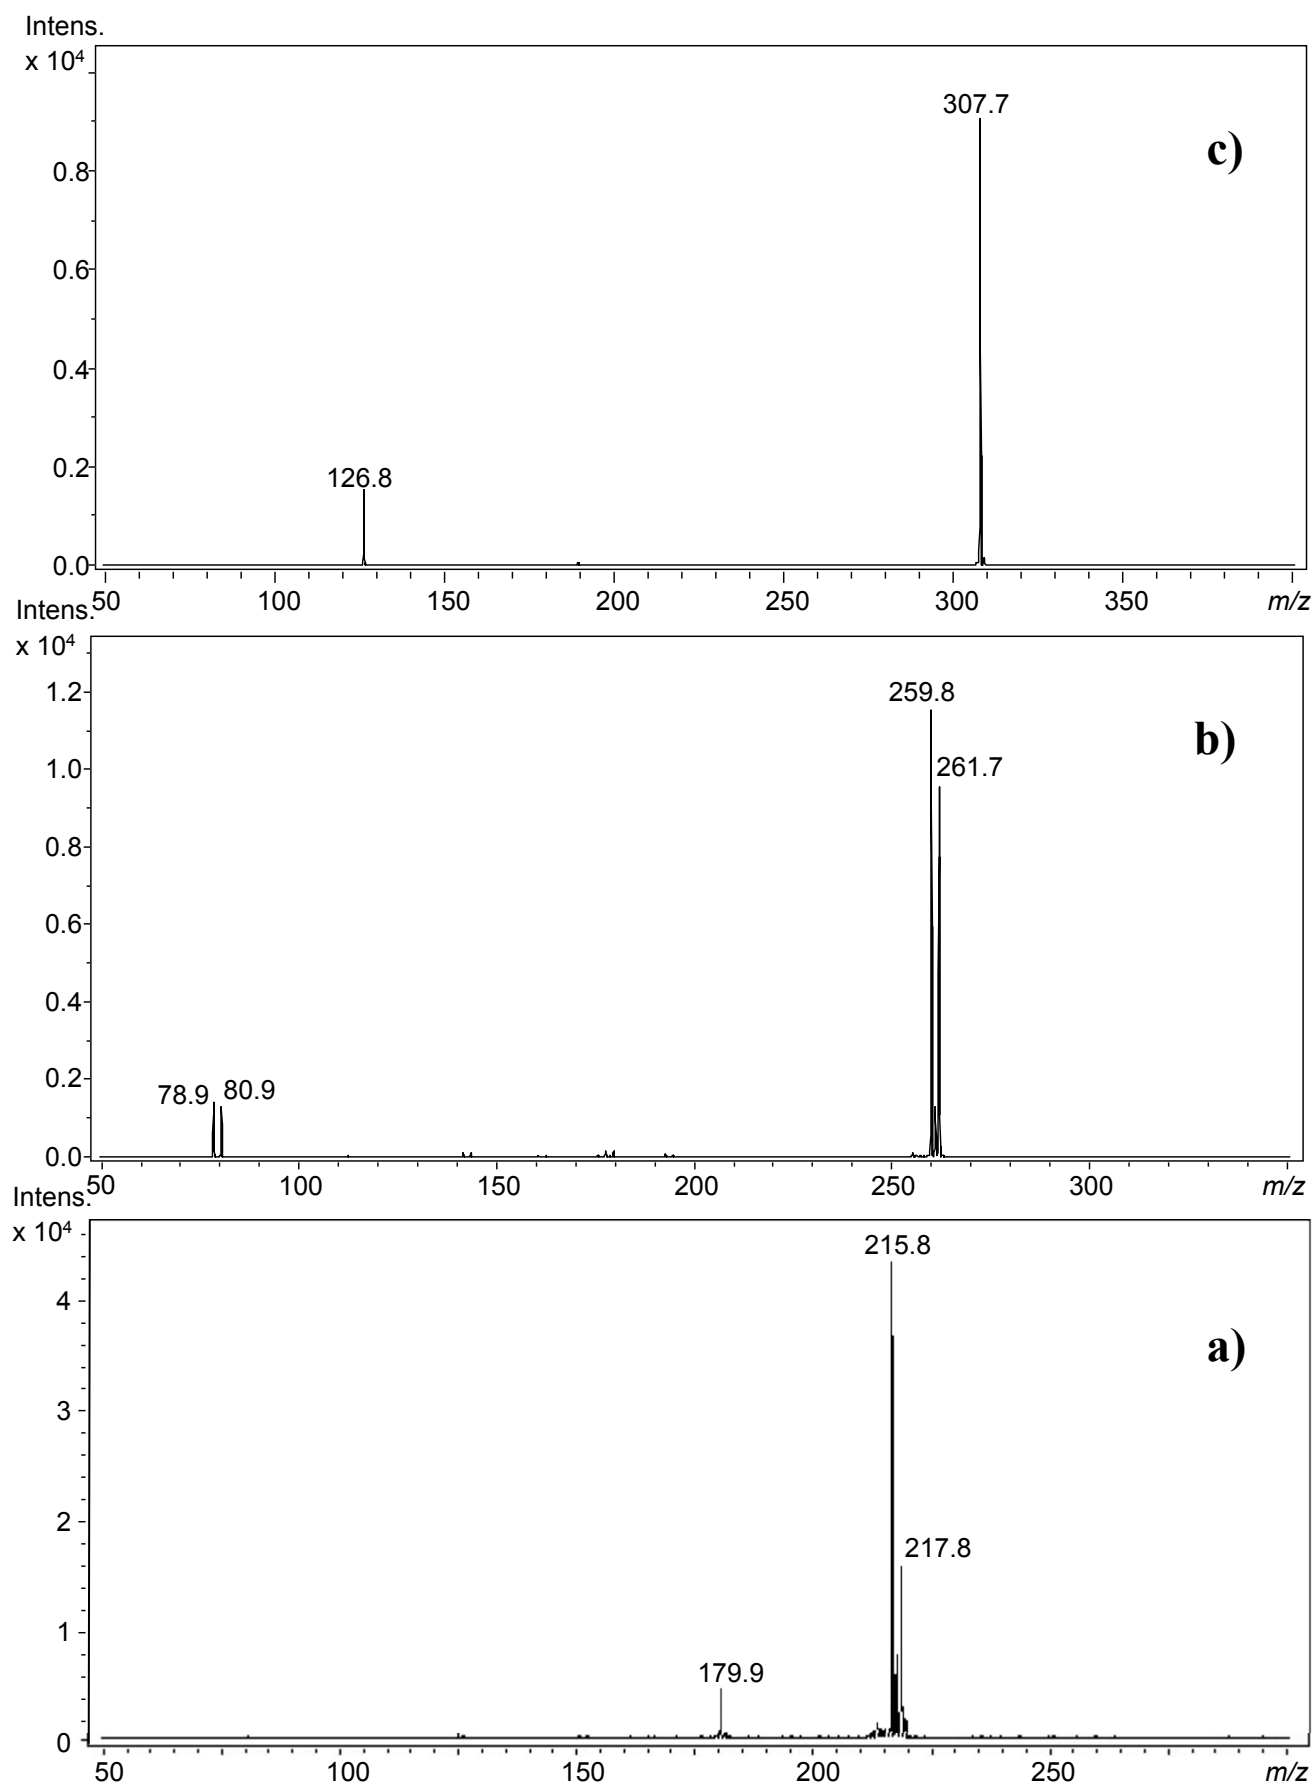

**Fig. S1** Negative ESI mass spectra recorded upon selection of halide L-tyrosine adducts, a) [Tyr+Cl]<sup>-</sup> (*m/z* 216/218); b) [Tyr+Br]<sup>-</sup> (*m/z* 260/262); and c) [Tyr+I]<sup>-</sup> (*m/z* 308), upon irradiation with CLIO FEL light on resonance at 1505, 1297, 1177 cm<sup>-1</sup>, respectively. Spectra recorded in a Bruker Esquire Paul ion trap mass spectrometer (Bruker, Esquire 3000+).

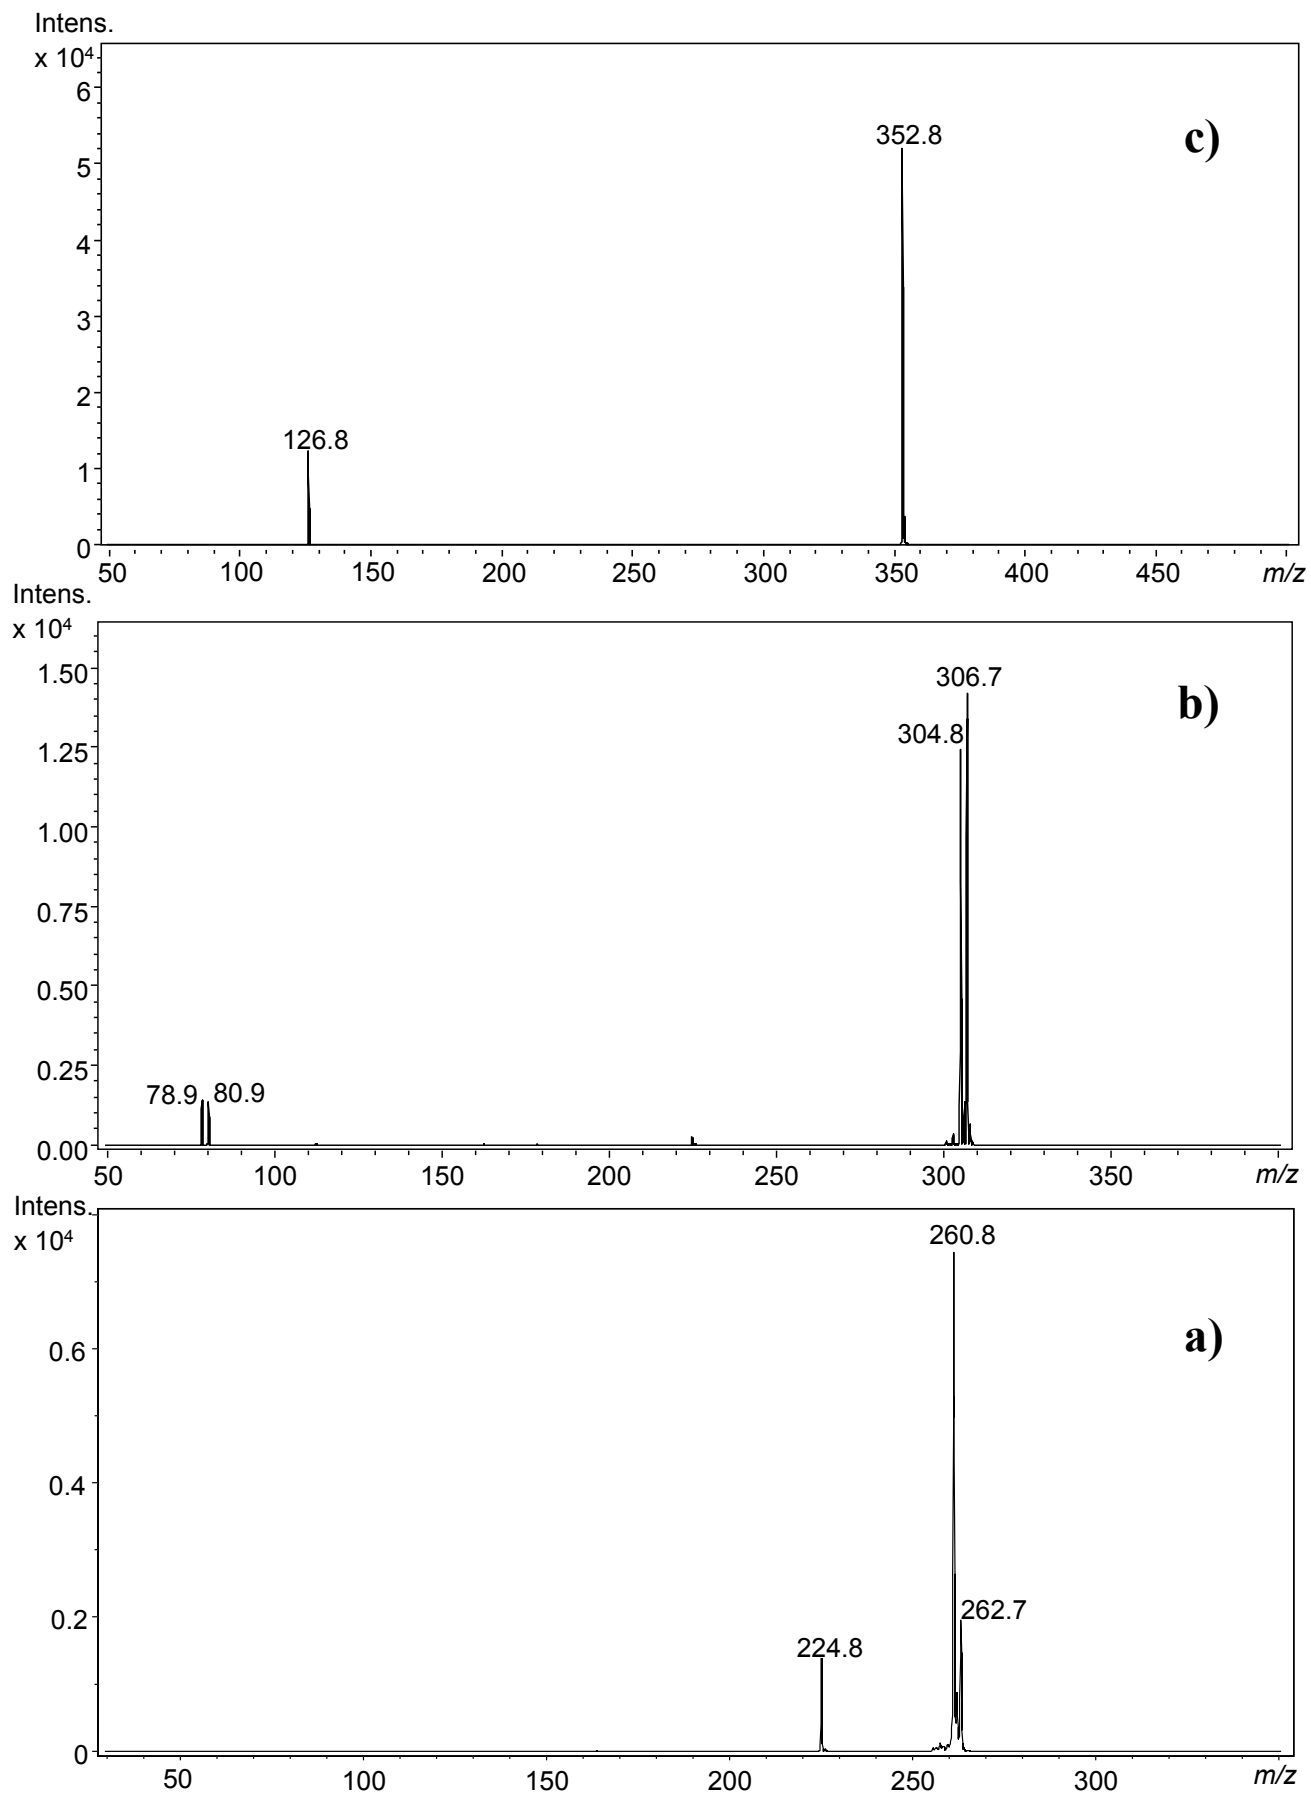

**Fig. S2** Negative ESI mass spectra recorded upon selection of halide 3-NO<sub>2</sub>-L-tyrosine adducts, a) [nitroTyr+Cl]<sup>-</sup> (*m/z* 261/263); b) [nitroTyr+Br]<sup>-</sup> (*m/z* 305/307); and c) [nitroTyr+I]<sup>-</sup> (*m/z* 353), upon irradiation with CLIO FEL light on resonance at 1477, 1325, 1737 cm<sup>-1</sup>, respectively. Spectra recorded in a Bruker Esquire Paul ion trap mass spectrometer (Bruker, Esquire 3000+).

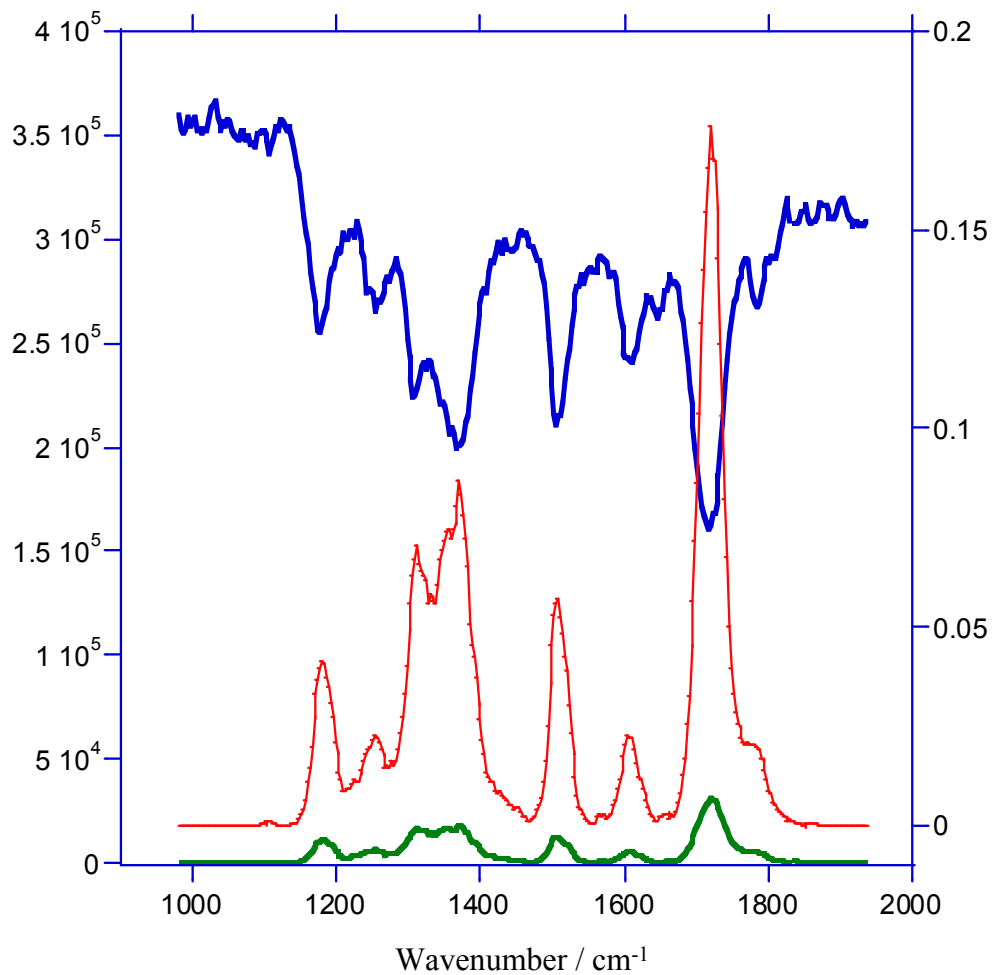

**Fig. S3** Experimental IRMPD signals of  $[\text{Tyr}+\text{Cl}]^-$  recorded in the parent ion channel depletion ( $[\text{Tyr}+\text{Cl}]^-$ , blue profile), the fragment ion channel ( $[\text{Tyr}-\text{H}]^-$ , green profile), and the IRMPD efficiency ( $R$ , red profile) in the 950-1950  $\text{cm}^{-1}$  range.  $R$  scale is on the right vertical axis and ion abundances (in arbitrary units) are on the left vertical axis.

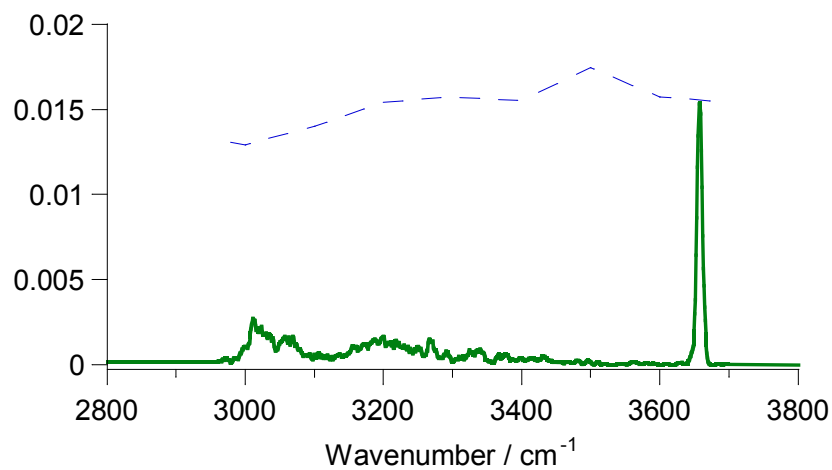

**Fig. S4** Experimental IRMPD spectrum of [Tyr+Cl]<sup>-</sup> (green profile) in the 2800-3800 cm<sup>-1</sup> range. The blue dashed profile shows the laser power as a function of the IR wavenumber.

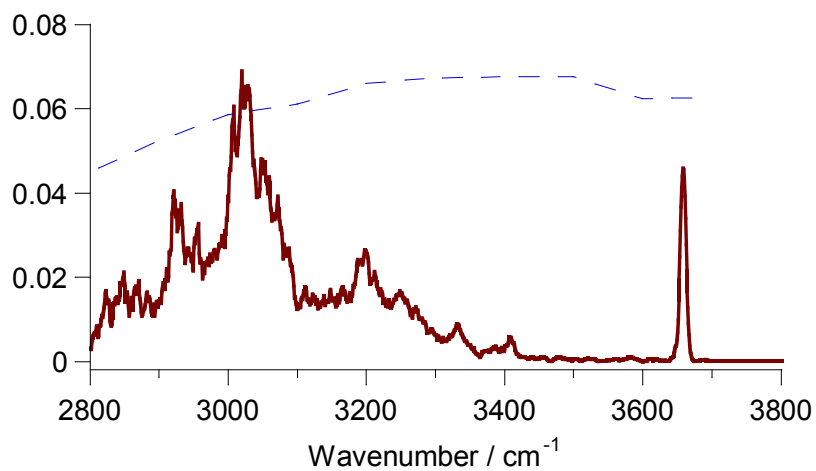

**Fig. S5** Experimental IRMPD spectrum of [Tyr+Br]<sup>-</sup> (brown profile) in the 2800-3800 cm<sup>-1</sup> range. The blue dashed profile shows the laser power as a function of the IR wavenumber.

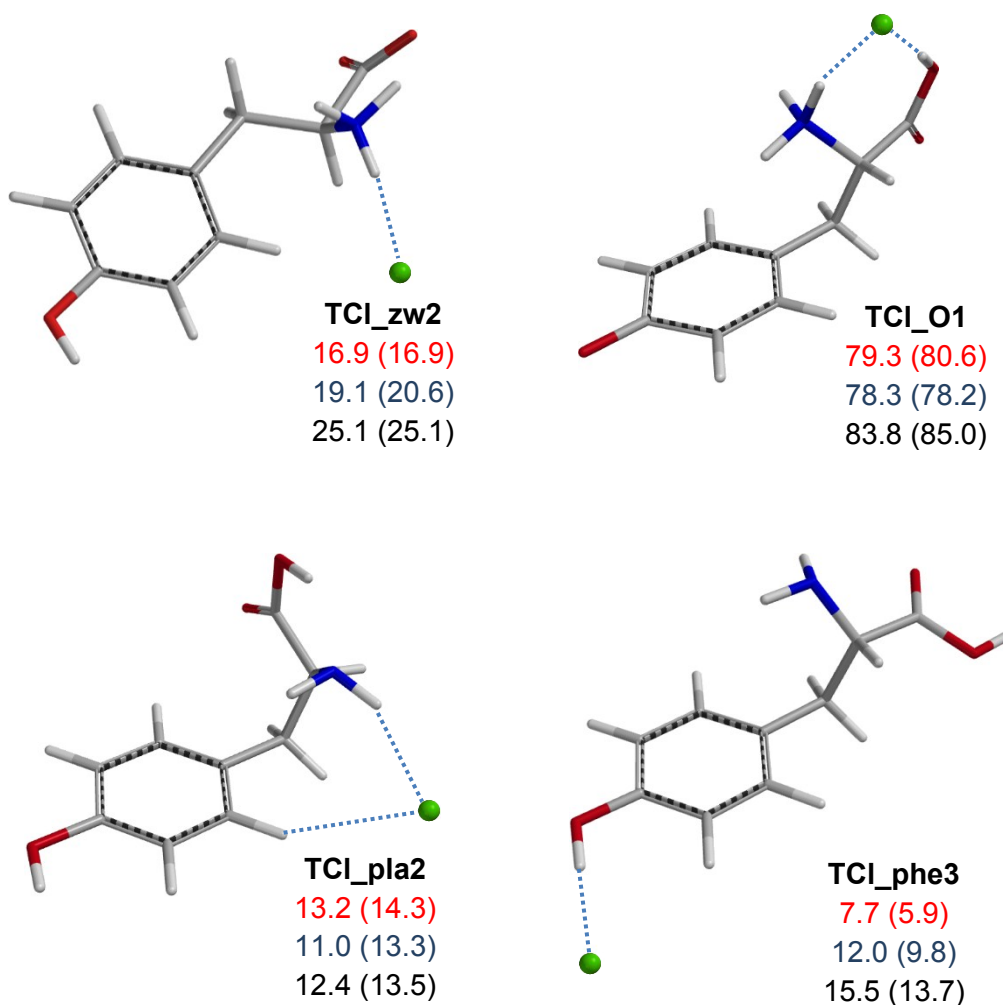

**Fig. S6** Optimized minimum energy structures for selected isomers (**TCI\_pla2**, **TCI\_phe3**, **TCI\_zw2**, and **TCI\_O1**) of [Tyr+Cl]<sup>-</sup>. Relative enthalpies and relative free energies (bracketed) at the B3LYP/6-311++G(d,p) (in red), B3LYP-D3/6-311++G(d,p) (in blue) and MP2//B3LYP/6-311++G(d,p) (in black) levels are provided at 298 K in kJ mol<sup>-1</sup>. Thermodynamic data are relative to the calculated energies of the most stable isomer presented in Fig. 2 (**TCI\_pla1**).

The monodentate **TCI\_phe3**, 13.7 5 kJ mol<sup>-1</sup> above the global minimum, features chloride coordinated to the phenol site, and a *right, gauche* structure, which arises from the rotation about the C1-C2 and O1-C1 bonds of **TCI\_phe1**. These changes modify the  $\angle\text{O1C1C2N}$  dihedral angle to 150.7° for **TCI\_phe3** and allows the amino hydrogen to interact with the carbonyl oxygen ( $r_{\text{CO}\cdots\text{HN}} = 2.48 \text{ \AA}$ ) of the carboxylic acid in a *cis* arrangement. The bidentate **TCI\_pla2** structure, 13.5 kJ mol<sup>-1</sup> above the global minimum is endowed with a *left, gauche* geometry, obtained by rotation of C1C2, C2C3, and C2N bonds of **TCI\_pla1**, and binds chloride between amine ( $r_{\text{Cl}\cdots\text{HN}} = 2.28 \text{ \AA}$ ) and aromatic ( $r_{\text{Cl}\cdots\text{HC}} = 2.89 \text{ \AA}$ ) hydrogens, while the carboxylic acid in *trans* interacts as a H-bond donor with the N-terminus ( $r_{\text{N}\cdots\text{HOC}} = 1.81 \text{ \AA}$ ). Not unexpectedly, from the above comparison it turns out that the dual CH $\cdots$ Cl $\cdots$ HOC(O) hydrogen-bonding interactions (in **TCI\_pla1**) are more beneficial than CH $\cdots$ Cl $\cdots$ HN (in **TCI\_pla2**) in stabilizing chloride-bound tyrosine adduct.

The **TCI\_zw2** conformer, with a more extended conformation than **TCI\_zw1** results 25.1 kJ mol<sup>-1</sup> less favorable than **TCI\_pla1**.



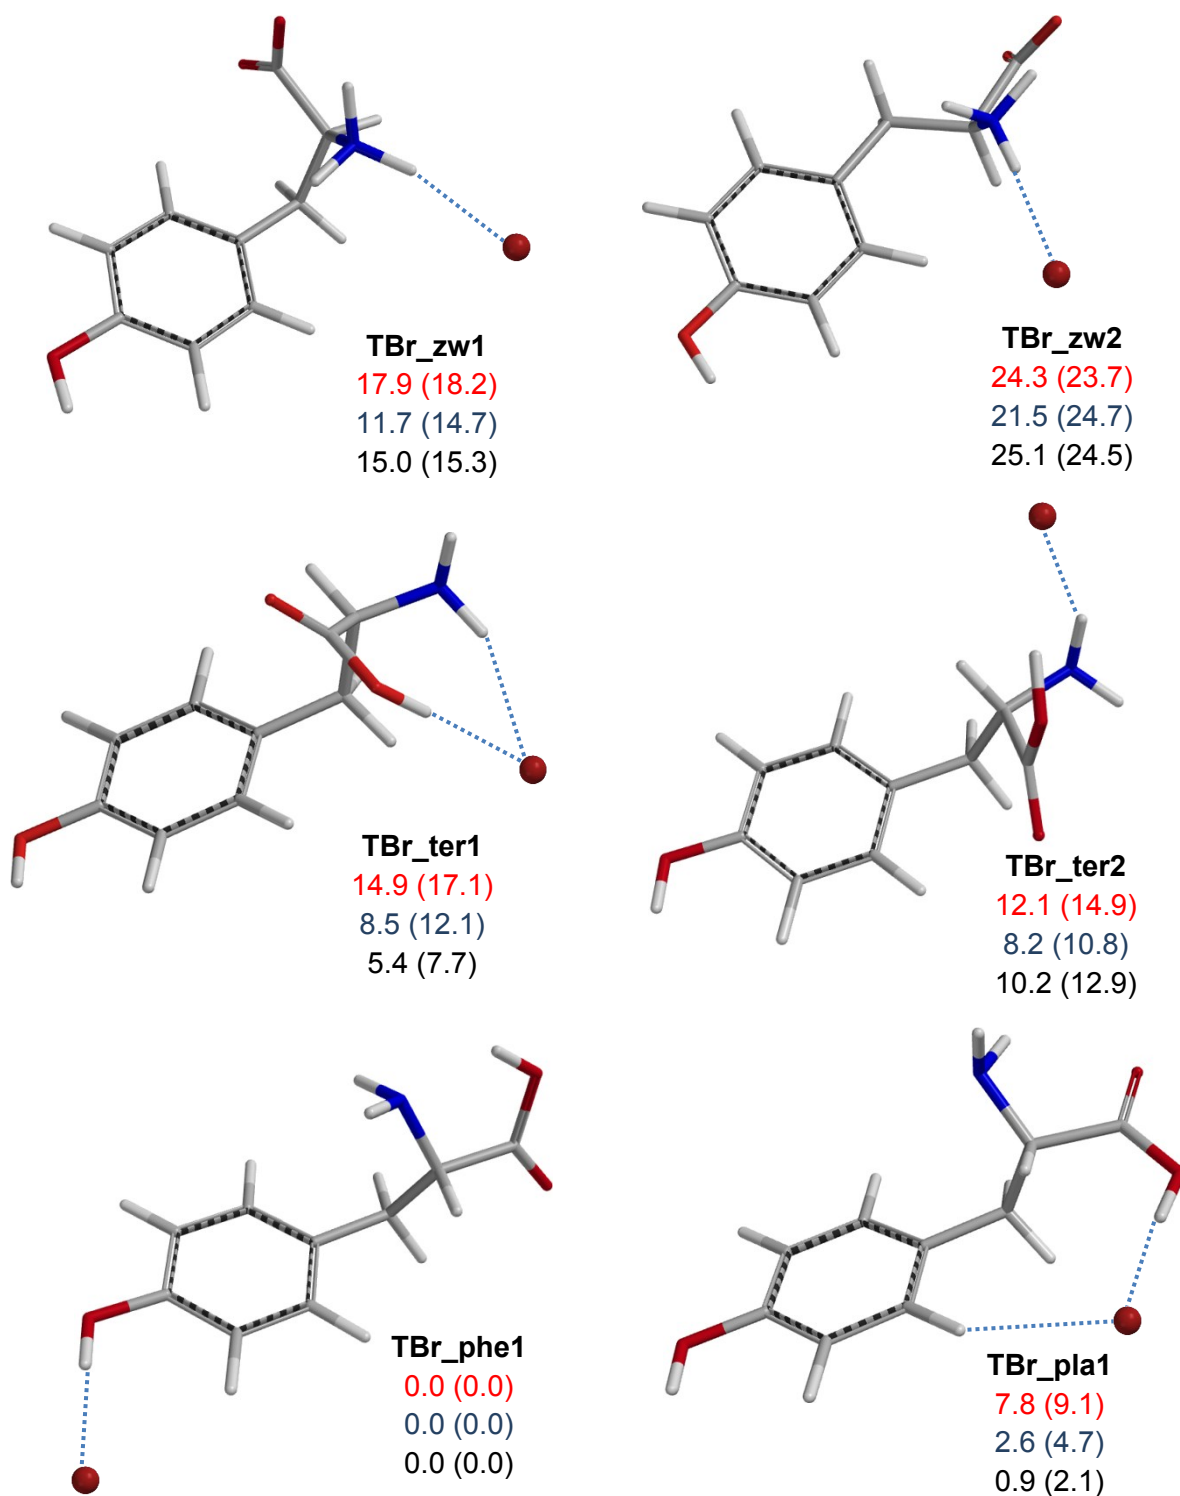

**Fig. S7** Optimized minimum energy structures for selected isomers (**TBr\_phe1**, **TBr\_pla1**, **TBr\_ter1**, **TBr\_ter2**, **TBr\_zw1**, and **TBr\_zw2**) of [Tyr+Br]<sup>-</sup>. Relative enthalpies and relative free energies (bracketed) at the B3LYP/6-311++G(d,p) (in red), B3LYP-D3/6-311++G(d,p) (in blue) and MP2//B3LYP/6-311++G(d,p) (in black) levels are provided at 298 K in kJ mol<sup>-1</sup>.

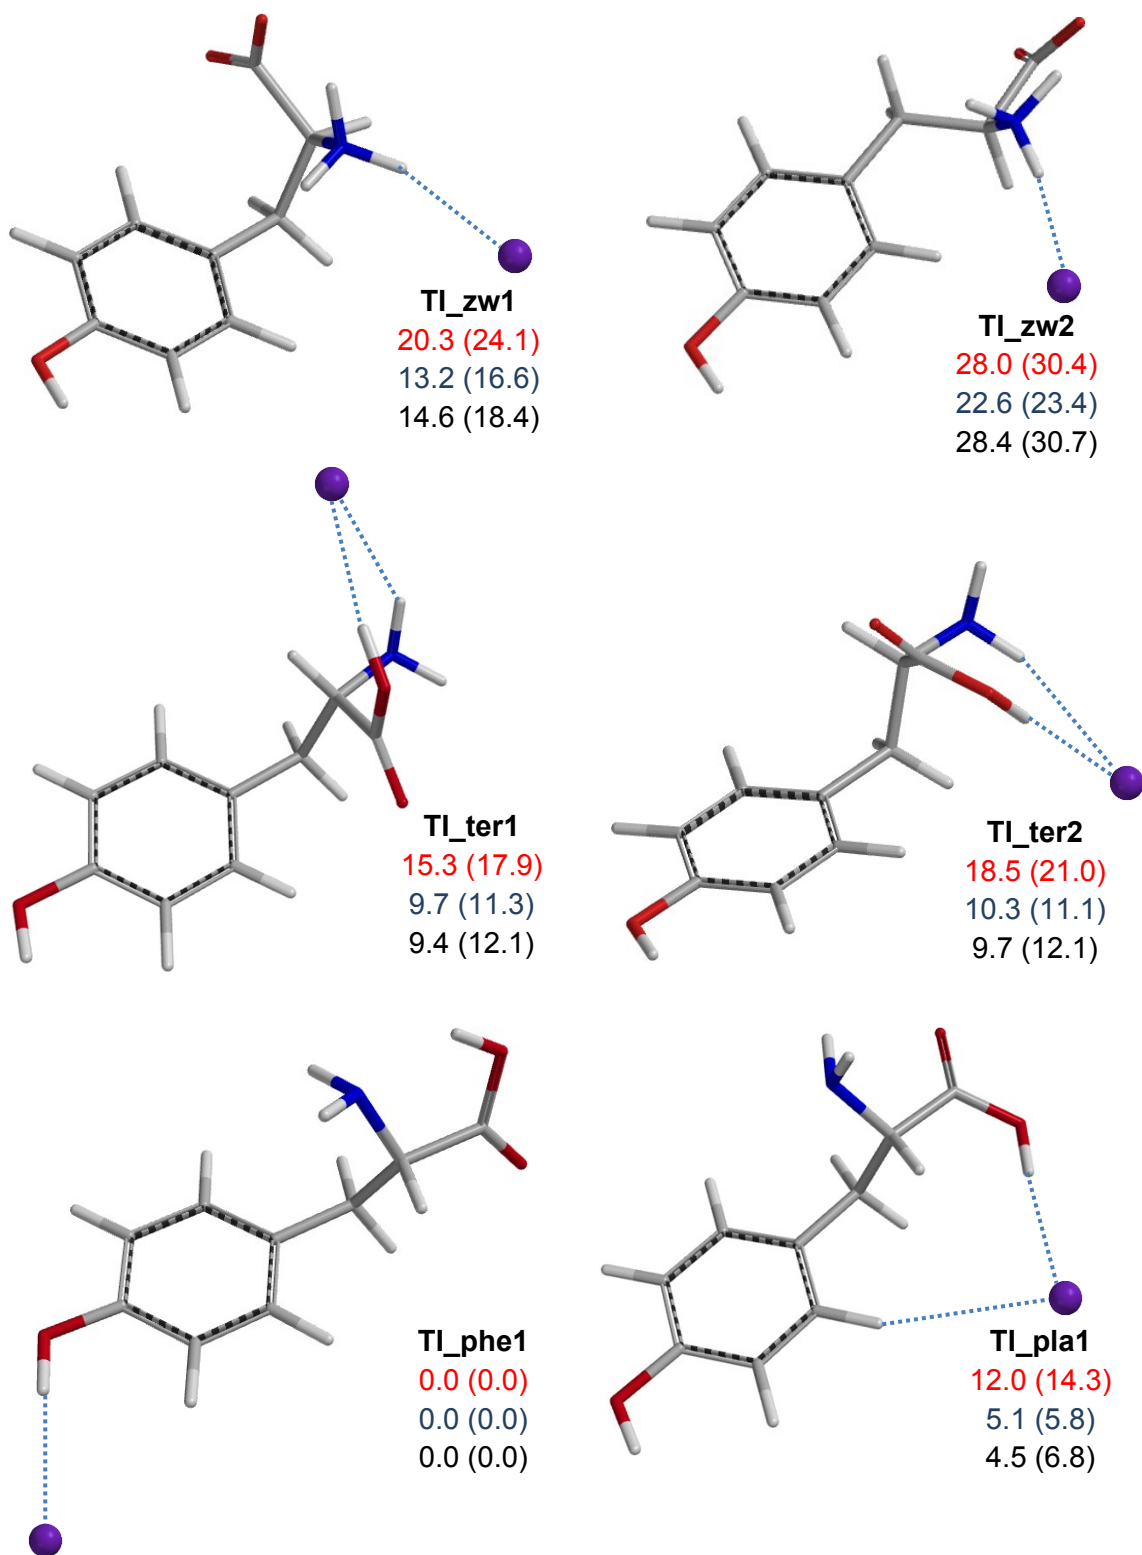

**Fig. S8** Optimized minimum energy structures for selected isomers (**TI\_phe1**, **TI\_pla1**, **TI\_ter1**, **TI\_ter2**, **TI\_zw1**, and **TI\_zw2**) of  $[\text{Tyr}+\text{I}]^-$ . Relative enthalpies and relative free energies (bracketed) at the B3LYP/6-311++G(d,p) (in red), B3LYP-D3/6-311++G(d,p) (in blue) and MP2//B3LYP/6-311++G(d,p) (in black) levels are provided at 298 K in  $\text{kJ mol}^{-1}$ .

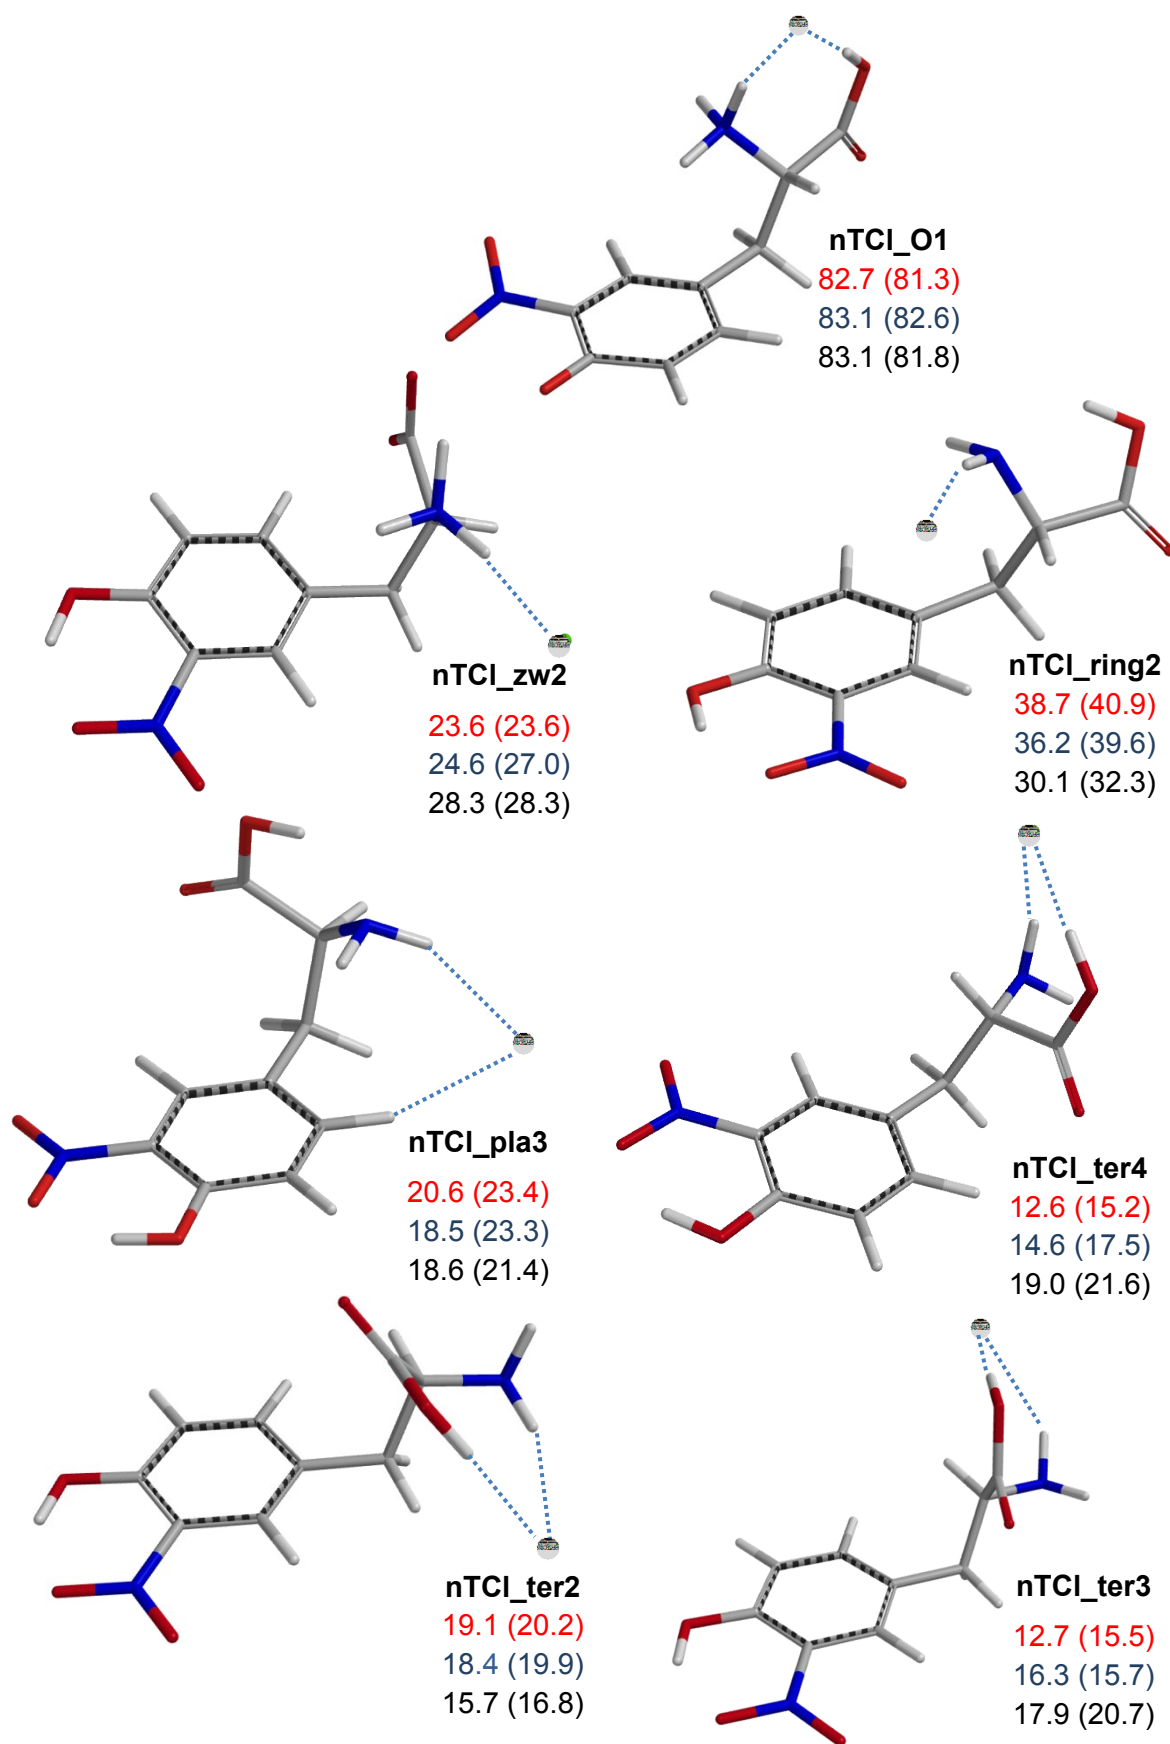

**Fig. S9** Optimized minimum energy structures for selected isomers (**nTCl\_ter2**, **nTCl\_ter3**, **nTCl\_pla3**, **nTCl\_ter4**, **nTCl\_zw2**, **nTCl\_ring2**, **nTCl\_O1**) of [nitroTyr+Cl]<sup>-</sup>. Relative enthalpies and relative free energies (bracketed) at the B3LYP/6-311++G(d,p) (in red), B3LYP-D3/6-311++G(d,p) (in blue) and MP2//B3LYP/6-311++G(d,p) (in black) levels are provided at 298 K in kJ mol<sup>-1</sup>. Thermodynamic data are relative to the calculated energies of the most stable isomer presented in Fig. 3 (**nTCl\_pla1**).

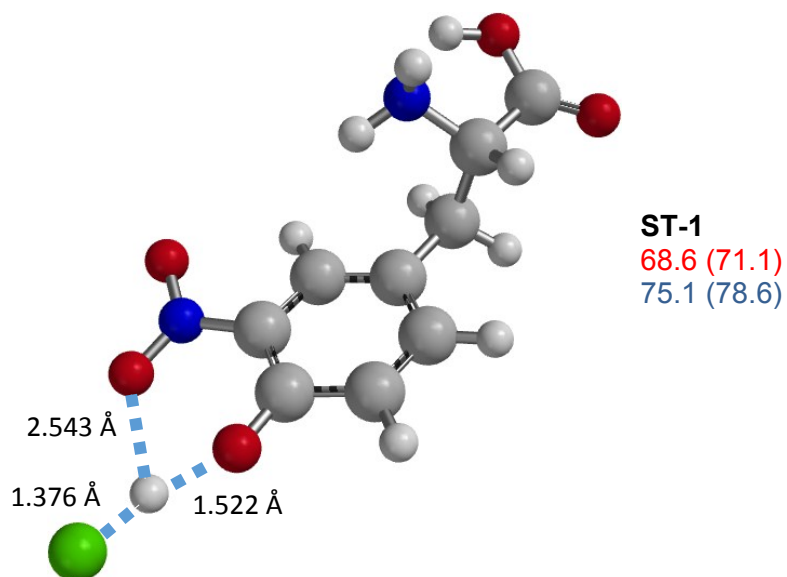

**Fig. S10** Optimized geometry deriving from an initial structure whereby HCl is acting as hydrogen bond donor towards both phenoxide oxygen and an oxygen atom of the nitro group. This species (**ST-1**) is not a minimum being characterized by an imaginary frequency. Relative enthalpies and relative free energies (bracketed) at the B3LYP/6-311++G(d,p) (in red), and B3LYP-D3/6-311++G(d,p) (in blue) levels are provided at 298 K in  $\text{kJ mol}^{-1}$ . Interatomic bond distances, marked by dashed lines, are reported in Å.

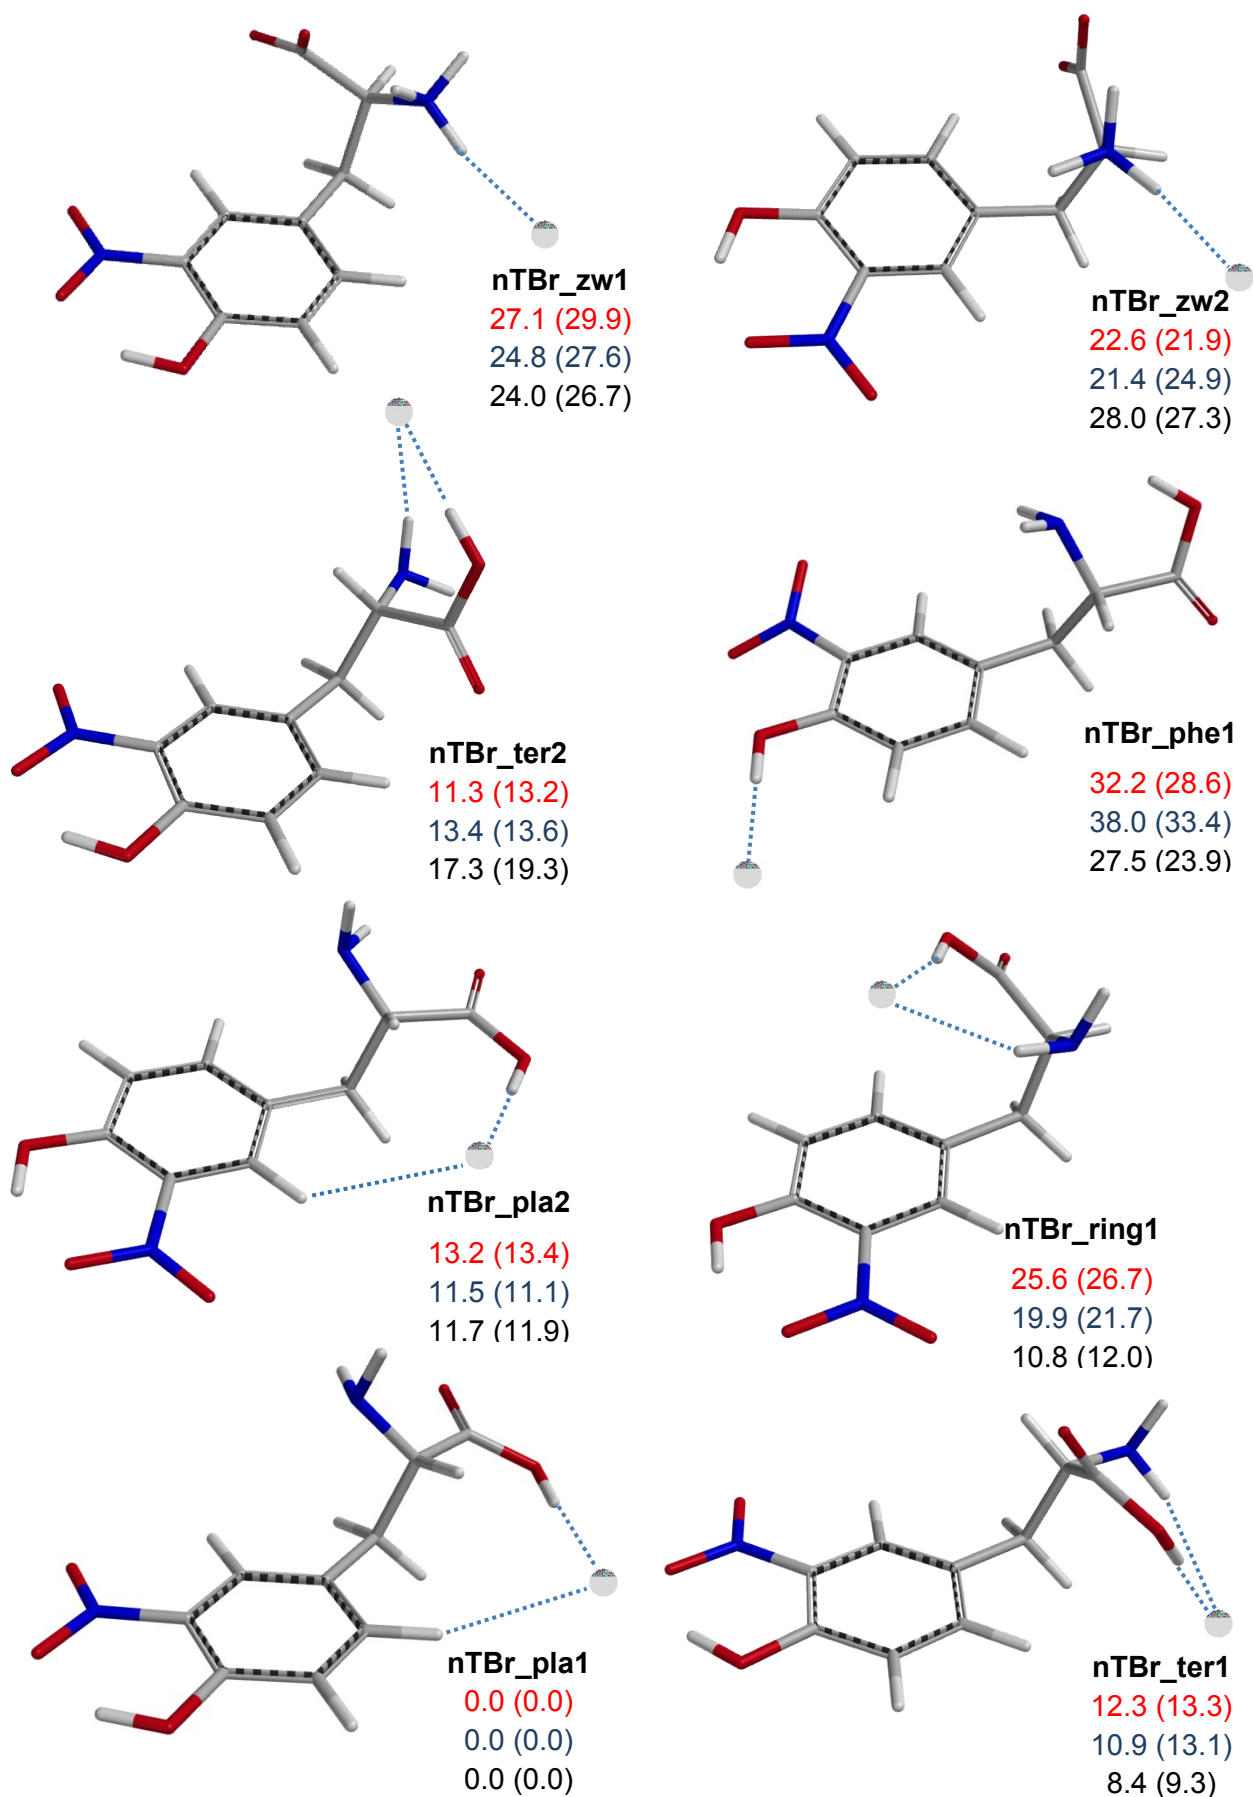

**Fig. S11** Optimized minimum energy structures for selected isomers (nTBr\_pla1, nTBr\_ter1, nTBr\_pla2, nTBr\_ring1, nTBr\_ter2, nTBr\_phe1, nTBr\_zw1, nTBr\_zw2) of [nitroTyr+Br]<sup>-</sup>. Relative enthalpies and relative free energies (bracketed) at the B3LYP/6-311++G(d,p) (in red), B3LYP-D3/6-311++G(d,p) (in blue) and MP2//B3LYP/6-311++G(d,p) (in black) levels are provided at 298 K in kJ mol<sup>-1</sup>.

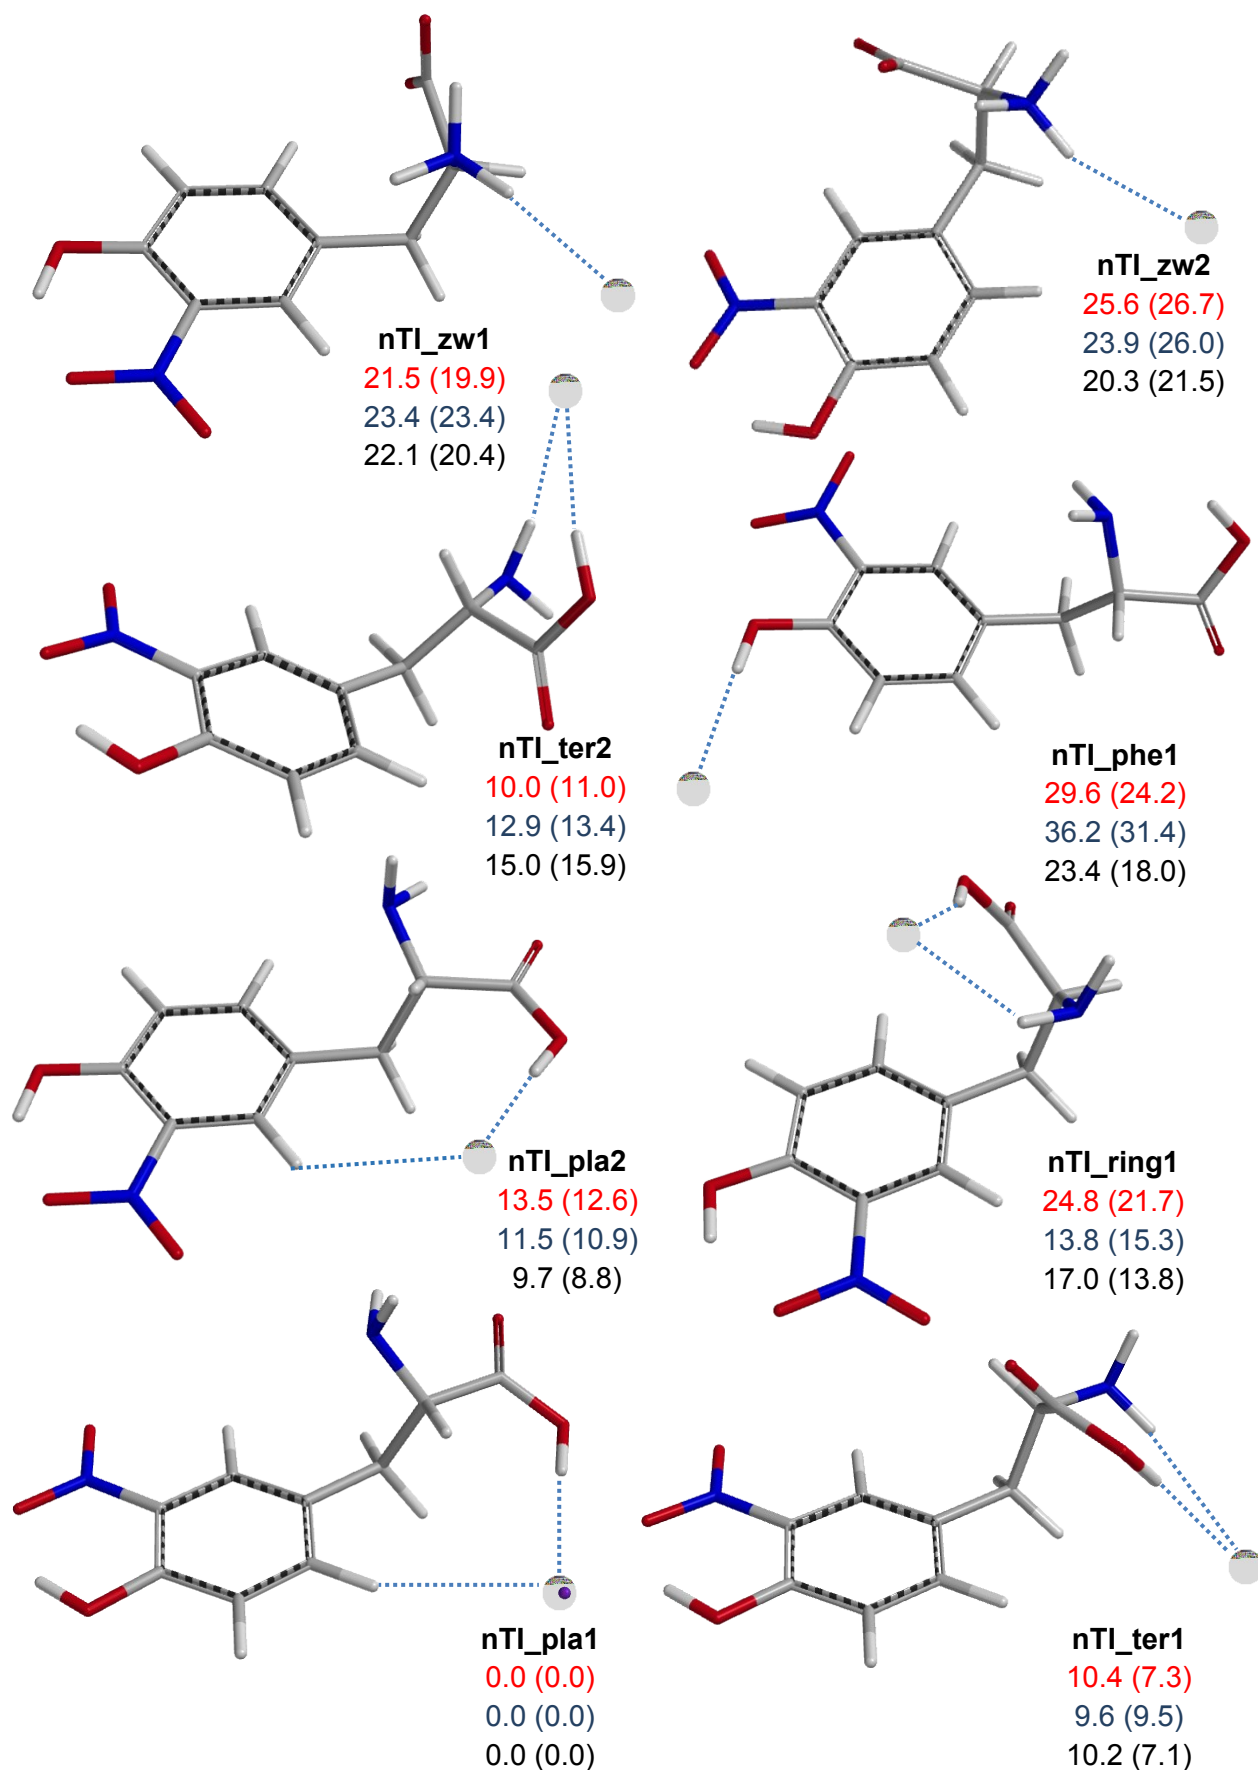

**Fig. S12** Optimized minimum energy structures for selected isomers (**nTI\_pla1**, **nTI\_ter1**, **nTI\_pla2**, **nTI\_ring1**, **nTI\_ter2**, **nTI\_phe1**, **nTI\_zw1**, **nTI\_zw2**) of [nitroTyr+I]<sup>-</sup>. Relative enthalpies and relative free energies (bracketed) at the B3LYP/6-311++G(d,p) (in red), B3LYP-D3/6-311++G(d,p) (in blue) and MP2/B3LYP/6-311++G(d,p) (in black) levels are provided at 298 K in kJ mol<sup>-1</sup>.

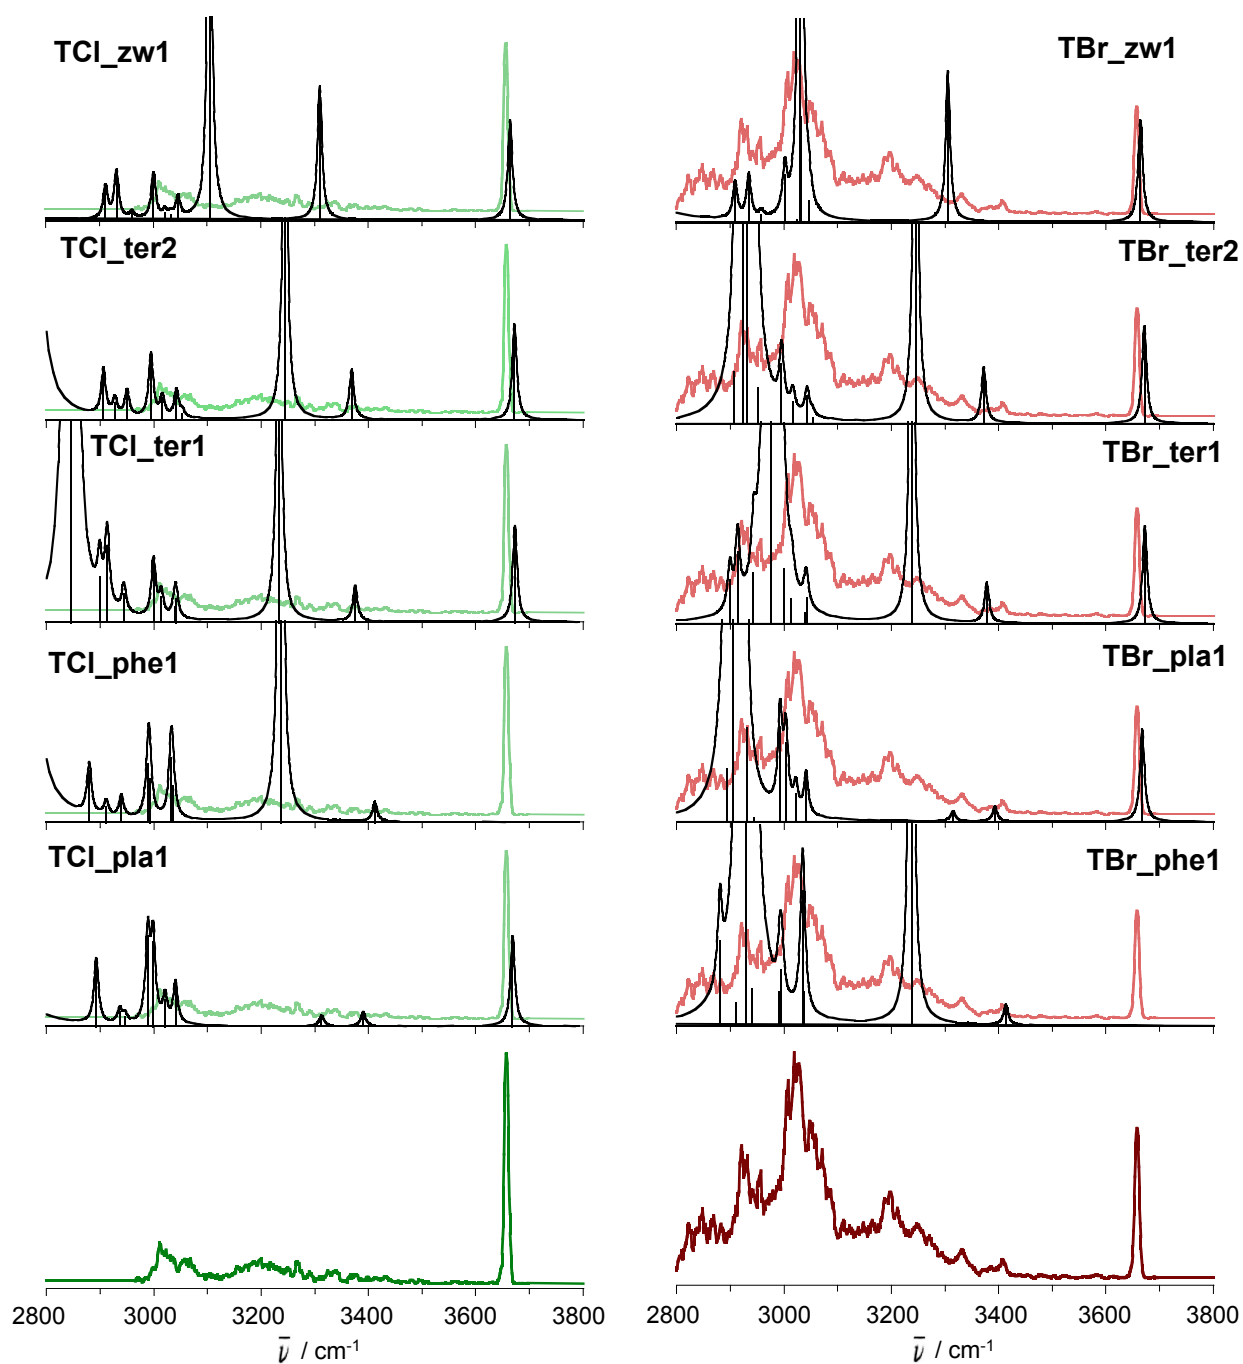

**Fig. S13** Experimental IRMPD spectra of  $[\text{Tyr}+\text{Cl}]^-$  (green profile) and  $[\text{Tyr}+\text{Br}]^-$  (brown profile) in the NH/OH stretch range compared with IR spectra [ $\text{km mol}^{-1}$ ] for **TCI\_pla1**, **TCI\_phe1**, **TCI\_ter1**, **TCI\_ter2**, **TCI\_zw1** and **TBr\_phe1**, **TBr\_pla1**, **TBr\_ter1**, **TBr\_ter2**, **TBr\_zw1** structures obtained at the B3LYP/6-311++G(d,p) level of theory and scaled by a factor of 0.955. The pale profiles report the experimental  $[\text{Tyr}+\text{Cl}]^-$  (pale green) and  $[\text{Tyr}+\text{Br}]^-$  (pale brown) spectra.

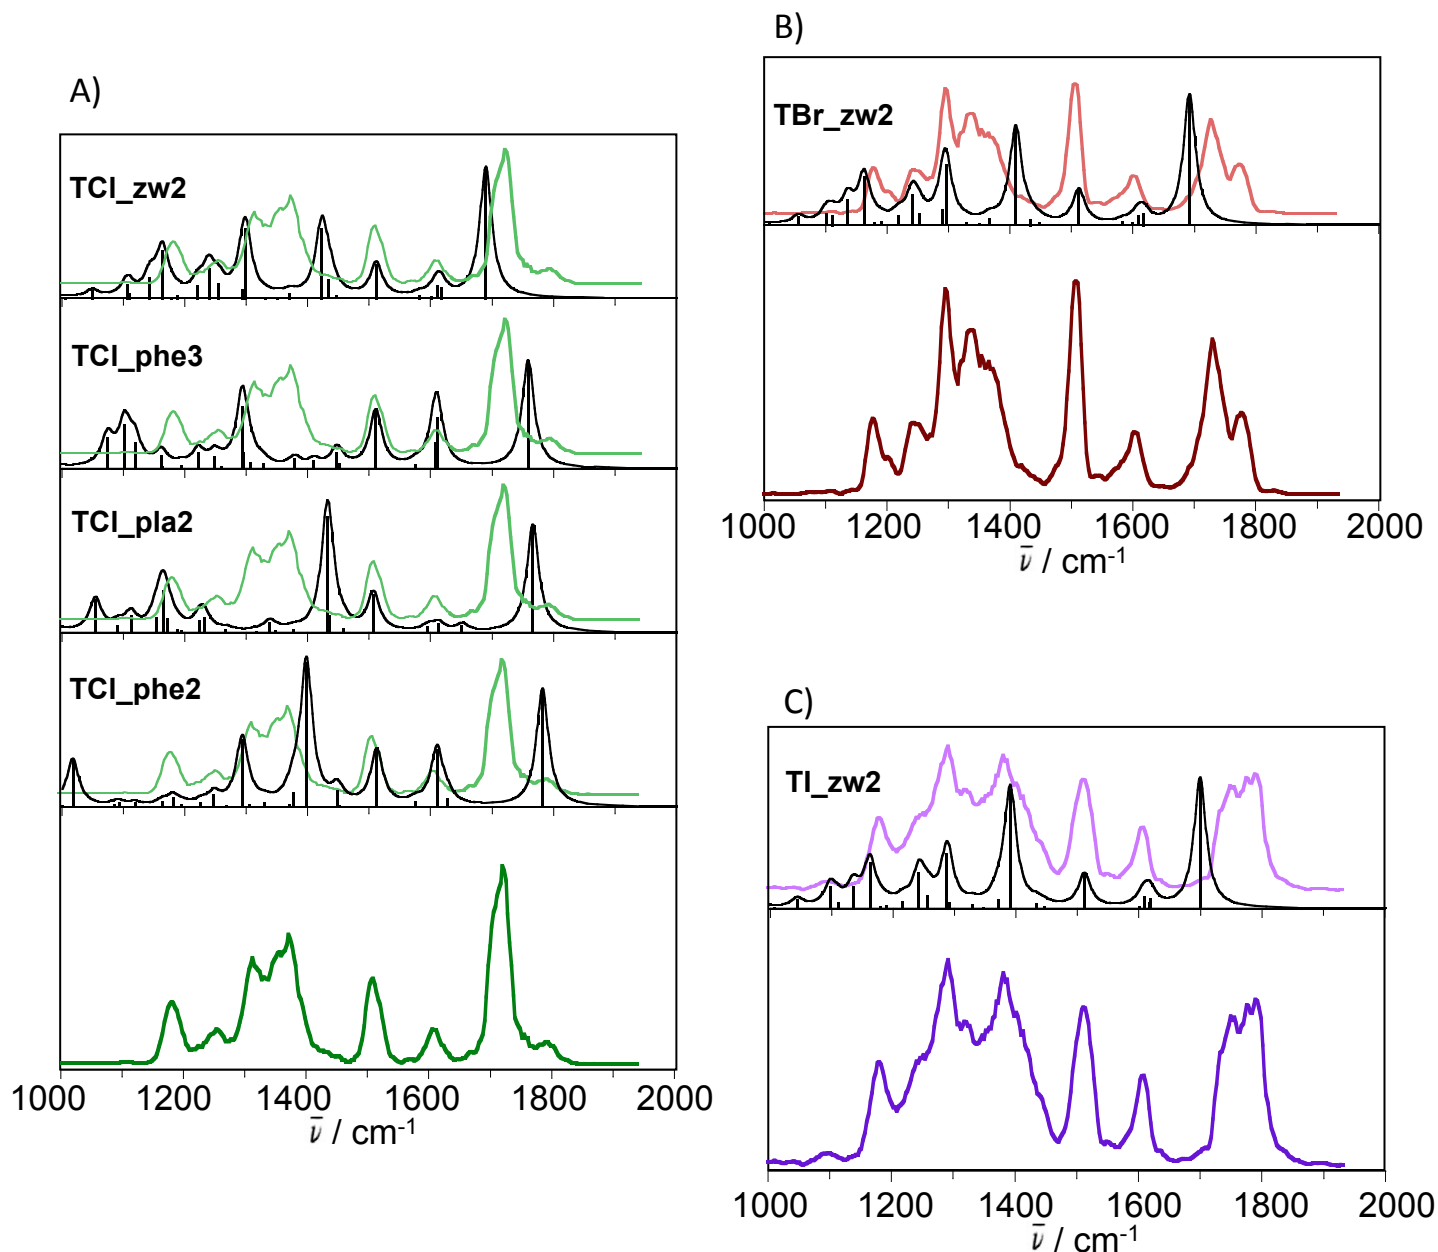

**Fig. S14** Experimental IRMPD spectra of:  $[\text{Tyr}+\text{Cl}]^-$  (green profile, panel A) compared with IR spectra  $[\text{km mol}^{-1}]$  for **TCI\_phe2**, **TCI\_pla2**, **TCI\_phe3**, **TCI\_zw2** structures;  $[\text{Tyr}+\text{Br}]^-$  (brown profile, panel B) compared with IR spectra  $[\text{km mol}^{-1}]$  for **TBr\_zw2**;  $[\text{Tyr}+\text{I}]^-$  (purple profile, panel C) compared with IR spectra  $[\text{km mol}^{-1}]$  for **TI\_zw2**. Theoretical vibrational modes were obtained at the B3LYP/6-311++G(d,p) level of theory and scaled by a factor of 0.978.



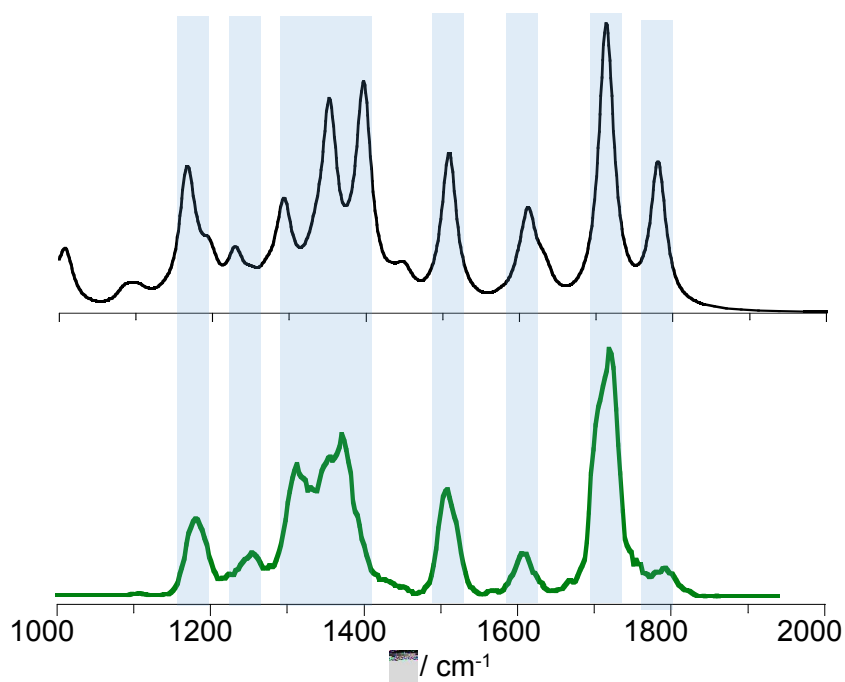

**Fig. S15** Averaged spectrum of [Tyr+Cl]<sup>-</sup> computed from the calculated Boltzmann populations of **TCl\_pla1**, **TCl\_phe1** and **TCl\_ter1** obtained from single-point free energy calculations at MP2//B3LYP/6-311++G(d,p) level. The experimental spectrum (green profile) is also shown to enable comparison.

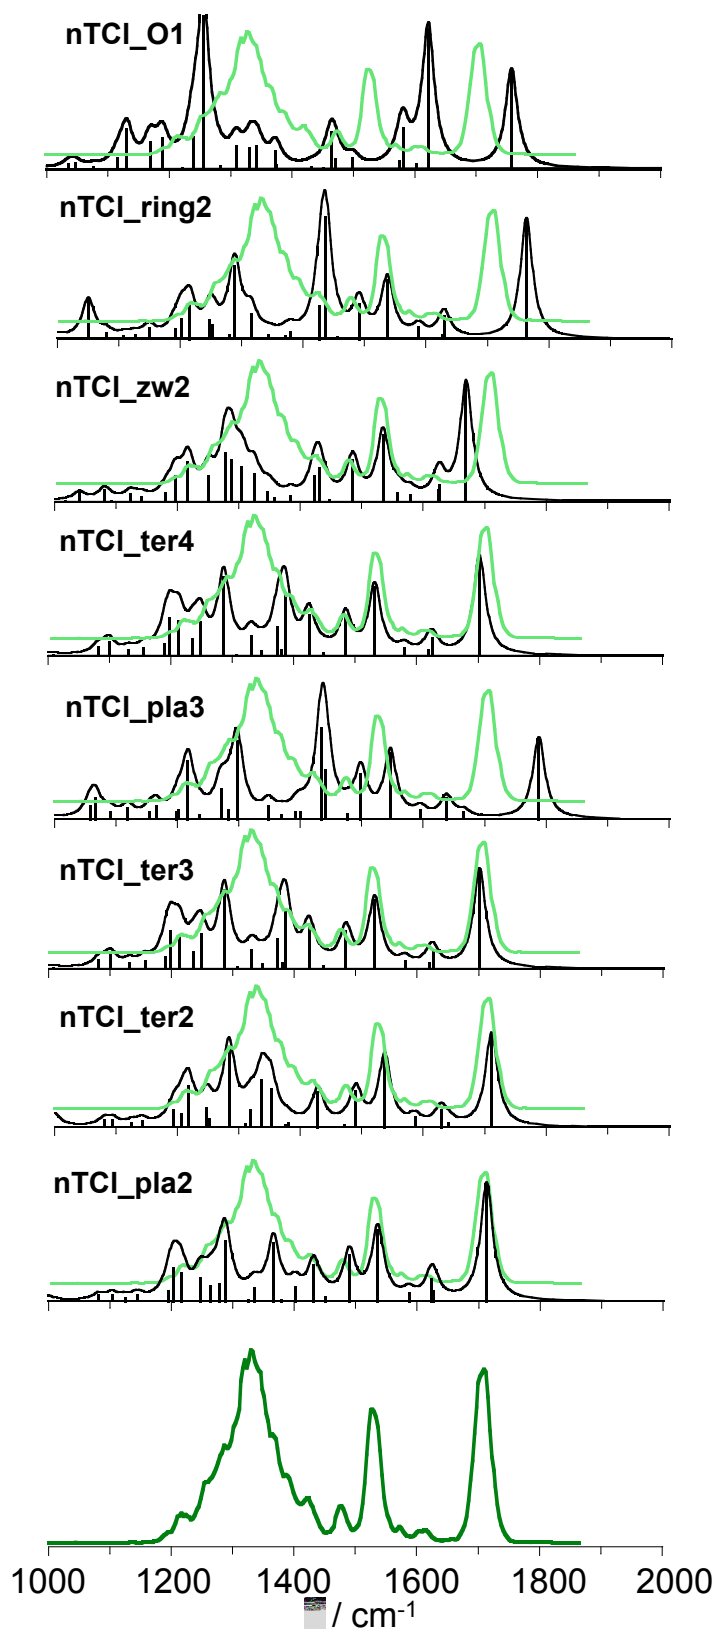

**Fig. S16** Experimental IRMPD spectrum (green profile) of chloride-bound 3-NO<sub>2</sub>-tyrosine adduct, [nitroTyr+Cl]<sup>-</sup>, compared with IR spectra [km mol<sup>-1</sup>] for **nTCI\_pla2**, **nTCI\_ter2**, **nTCI\_ter3**, **nTCI\_pla3**, **nTCI\_ter4**, **nTCI\_zw2**, **nTCI\_ring2**, **nTCI\_O1** structures obtained at the B3LYP/6-311++G(d,p) level of theory and scaled by a factor of 0.978.

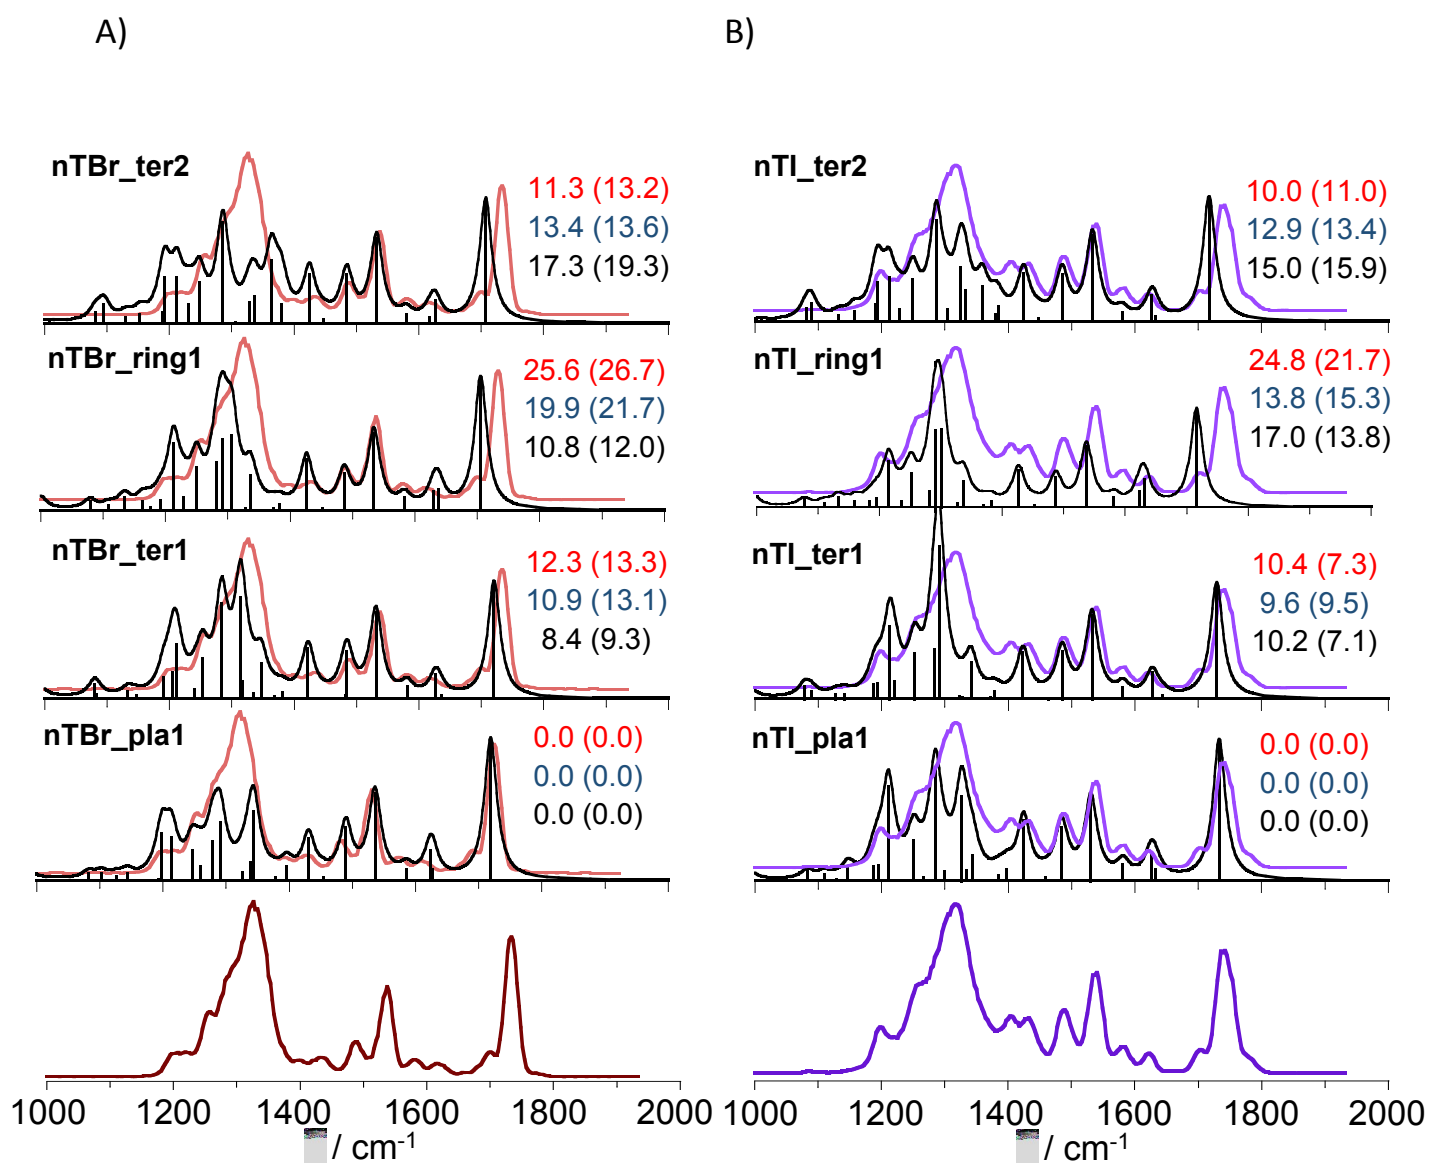

**Fig. S17** Experimental IRMPD spectra of: [nitroTyr+Br]<sup>-</sup> (brown profile, panel A) compared with IR spectra [km mol<sup>-1</sup>] for **nTBr\_pla1**, **nTBr\_ter1**, **nTBr\_ring1** and **nTBr\_ter2** structures; [nitroTyr+I]<sup>-</sup> (purple profile, panel B) compared with IR spectra [km mol<sup>-1</sup>] for **nTI\_pla1**, **nTI\_ter1**, **nTI\_ring1** and **nTI\_ter2** structures. Theoretical vibrational modes were obtained at the B3LYP/6-311++G(d,p) level of theory and scaled by a factor of 0.978. Relative enthalpies and relative free energies (bracketed) at the B3LYP/6-311++G(d,p) (in red), B3LYP-D3/6-311++G(d,p) (in blue) and MP2//B3LYP/6-311++G(d,p) (in black) levels are provided at 298 K in kJ mol<sup>-1</sup>.

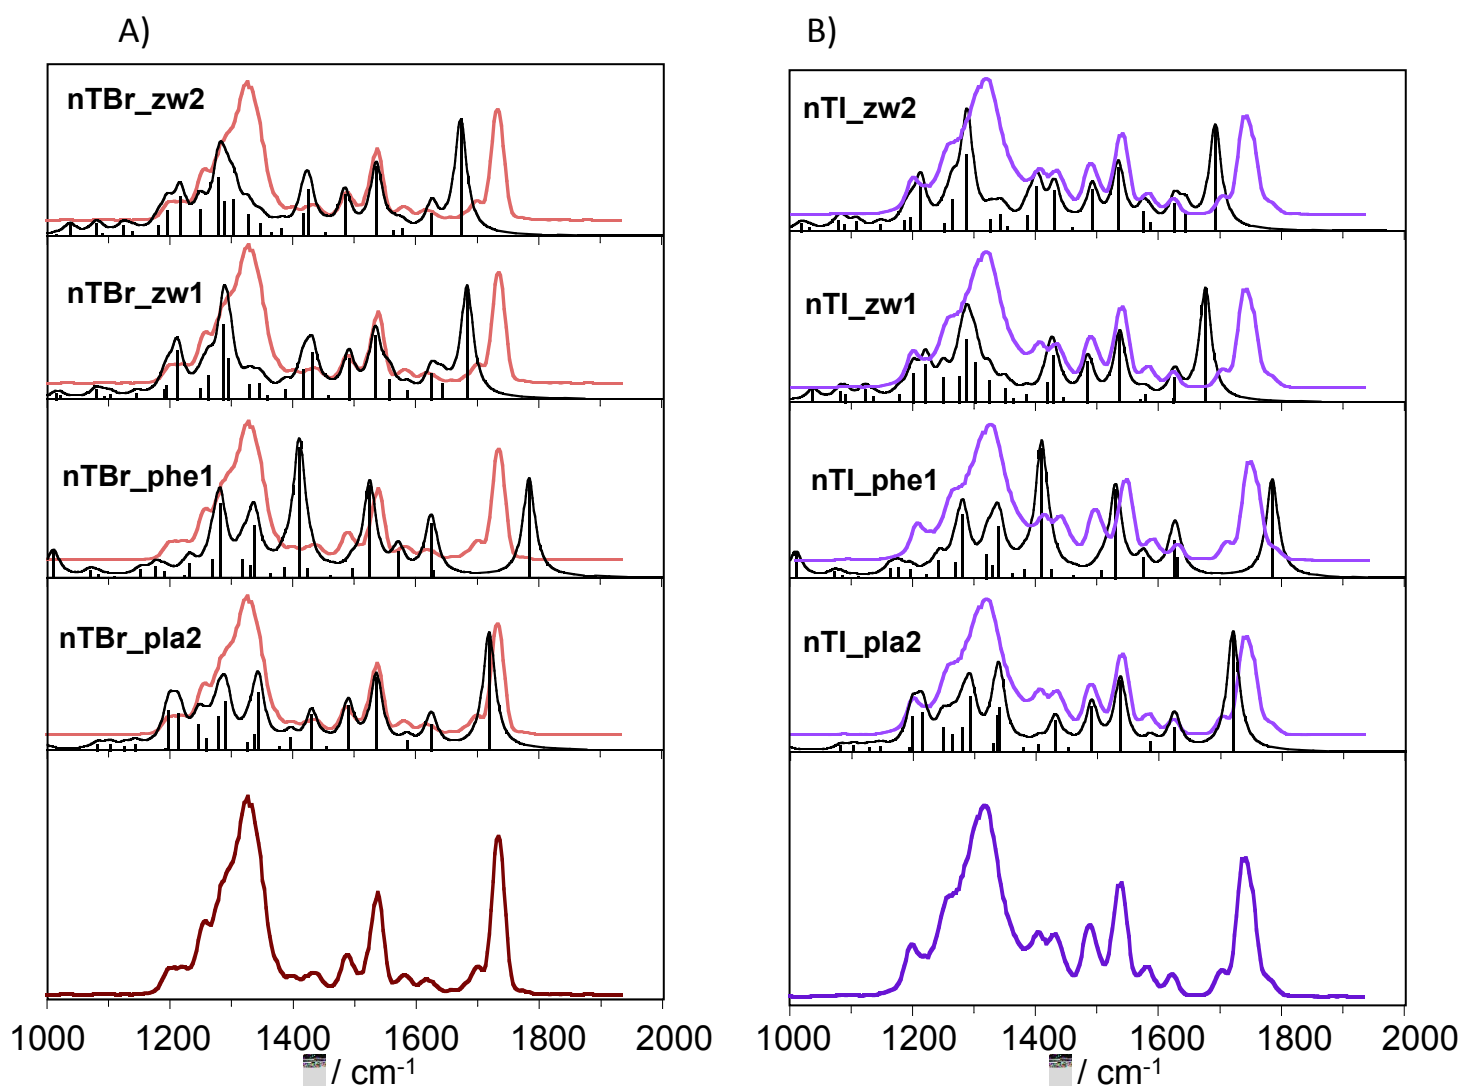

**Fig. S18** Experimental IRMPD spectra of:  $[\text{nitroTyr}+\text{Br}]^-$  (brown profile, panel A) compared with IR spectra [ $\text{km mol}^{-1}$ ] for **nTBr\_pla2**, **nTBr\_phe1**, **nTBr\_zw1** and **nTBr\_zw2** structures;  $[\text{nitroTyr}+\text{I}]^-$  (purple profile, panel B) compared with IR spectra [ $\text{km mol}^{-1}$ ] for **nTI\_pla2**, **nTI\_phe1**, **nTI\_zw1** and **nTI\_zw2** structures. Theoretical vibrational modes were obtained at the B3LYP/6-311++G(d,p) level of theory and scaled by a factor of 0.978.

**Table S1** Calculated energies (kJ mol<sup>-1</sup>) at the B3LYP/6-311++G\*\* level for the reaction:  
[(nitro)Tyr+X]<sup>-</sup> → (nitro)Tyr + X<sup>-</sup> (X = Cl, Br, I).

|               | [Tyr+X] <sup>-</sup> |                  | [nitroTyr+X] <sup>-</sup> |                  |
|---------------|----------------------|------------------|---------------------------|------------------|
|               | $\Delta H_{298}$     | $\Delta G_{298}$ | $\Delta H_{298}$          | $\Delta G_{298}$ |
| <b>X = Cl</b> | 121.21               | 96.01            | 153.01                    | 124.08           |
| <b>X = Br</b> | 108.26               | 81.05            | 136.01                    | 106.71           |
| <b>X = I</b>  | 97.83                | 69.10            | 118.82                    | 84.43            |

**Table S2** Thermodynamic data (kJ mol<sup>-1</sup>) for the most stable structures of [Tyr+X]<sup>-</sup> (X = Cl, Br, I) adducts calculated at different levels of theory.

|                             | B3LYP <sup>a</sup>     |                        | B3LYP-D3 <sup>a</sup>  |                        | MP2//B3LYP <sup>b</sup> |                        |
|-----------------------------|------------------------|------------------------|------------------------|------------------------|-------------------------|------------------------|
|                             | <b>H<sub>rel</sub></b> | <b>G<sub>rel</sub></b> | <b>H<sub>rel</sub></b> | <b>G<sub>rel</sub></b> | <b>H<sub>rel</sub></b>  | <b>G<sub>rel</sub></b> |
| <i>[Tyr+Cl]<sup>-</sup></i> |                        |                        |                        |                        |                         |                        |
| <b>TCl_pla1</b>             | 0.0                    | 0.0                    | 0.0                    | 0.0                    | 0.0                     | 0.0                    |
| <b>TCl_phe1</b>             | -4.8                   | -7.3                   | -3.2                   | -2.3                   | 3.8                     | 1.3                    |
| <b>TCl_phe2</b>             | -5.3                   | -6.4                   | -0.7                   | -2.5                   | 3.5                     | 2.4                    |
| <b>TCl_ter1</b>             | 8.5                    | 9.5                    | 6.2                    | 6.8                    | 6.1                     | 7.0                    |
| <b>TCl_ter2</b>             | 5.4                    | 6.8                    | 6.7                    | 7.7                    | 11.5                    | 12.9                   |
| <b>TCl_pla2</b>             | 13.2                   | 14.3                   | 11.0                   | 13.3                   | 12.4                    | 13.5                   |
| <b>TCl_phe3</b>             | 7.7                    | 5.9                    | 12.0                   | 9.8                    | 15.5                    | 13.7                   |
| <b>TCl_zw1</b>              | 11.9                   | 10.7                   | 10.2                   | 11.8                   | 15.3                    | 14.1                   |
| <b>TCl_zw2</b>              | 16.9                   | 16.9                   | 19.1                   | 20.6                   | 25.1                    | 25.1                   |
| <b>TCl_O1</b>               | 79.3                   | 80.6                   | 78.3                   | 78.2                   | 83.8                    | 85.0                   |
| <i>[Tyr+Br]<sup>-</sup></i> |                        |                        |                        |                        |                         |                        |
| <b>TBr_phe1</b>             | 0.0                    | 0.0                    | 0.0                    | 0.0                    | 0.0                     | 0.0                    |
| <b>TBr_pla1</b>             | 7.8                    | 9.1                    | 2.6                    | 4.7                    | 0.9                     | 2.1                    |
| <b>TBr_ter1</b>             | 14.9                   | 17.1                   | 8.5                    | 12.1                   | 5.4                     | 7.7                    |
| <b>TBr_ter2</b>             | 12.1                   | 14.9                   | 8.2                    | 10.8                   | 10.2                    | 12.9                   |
| <b>TBr_zw1</b>              | 17.9                   | 18.2                   | 11.7                   | 14.7                   | 15.0                    | 15.3                   |
| <b>TBr_zw2</b>              | 24.3                   | 23.7                   | 21.5                   | 24.7                   | 25.1                    | 24.5                   |
| <i>[Tyr+I]<sup>-</sup></i>  |                        |                        |                        |                        |                         |                        |
| <b>TI_phe1</b>              | 0.0                    | 0.0                    | 0.0                    | 0.0                    | 0.0                     | 0.0                    |
| <b>TI_pla1</b>              | 12.0                   | 14.3                   | 5.1                    | 5.8                    | 4.5                     | 6.8                    |
| <b>TI_ter1</b>              | 15.3                   | 17.9                   | 9.7                    | 11.3                   | 9.4                     | 12.1                   |
| <b>TI_ter2</b>              | 18.5                   | 21.0                   | 10.3                   | 11.1                   | 9.7                     | 12.1                   |
| <b>TI_zw1</b>               | 20.3                   | 24.1                   | 13.2                   | 16.6                   | 14.6                    | 18.4                   |
| <b>TI_zw2</b>               | 28.0                   | 30.4                   | 22.6                   | 23.4                   | 28.4                    | 30.7                   |

<sup>a</sup>The 6-311++G(d,p) basis set was employed. <sup>b</sup>Thermal and zero-point energy corrections obtained from B3LYP calculations. The Def2-TZVP ECP was used for iodine while keeping the 6-311++G(d,p) basis set for lighter atoms.

**TABLE S3** Selected dihedral angles (in Degrees) of the lowest energy structures of [Tyr+X]<sup>-</sup> (X = Cl, Br, I) adducts, calculated at the B3LYP/6-311++G(d,p) level of theory.

| Species                     | O1C1C2N NC2C3C1' C2C3C1'C2' |                |                |        |
|-----------------------------|-----------------------------|----------------|----------------|--------|
|                             | $\phi_1^{[a]}$              | $\phi_2^{[b]}$ | $\phi_3^{[c]}$ |        |
| <i>[Tyr+Cl]<sup>-</sup></i> |                             |                |                |        |
| TCl_pla1                    | 157.1                       | -67.3          | 102.4          | gauche |
| TCl_phe1                    | 10.2                        | -56.5          | 106.8          | gauche |
| TCl_phe2                    | 11.8                        | -59.5          | 98.0           | gauche |
| TCl_ter1                    | -57.6                       | -176.7         | 82.3           | anti   |
| TCl_ter2                    | 74.4                        | -163.8         | 93.9           | anti   |
| TCl_pla2                    | 17.4                        | 50.5           | 88.4           | gauche |
| TCl_phe3                    | 150.7                       | -58.7          | 97.8           | gauche |
| TCl_zw1                     | 19.4                        | 51.2           | 79.8           | gauche |
| TCl_zw2                     | 1.4                         | -65.2          | 175.5          | gauche |
| TCl_O1                      | 54.8                        | -41.5          | 102.6          | gauche |
| <i>[Tyr+Br]<sup>-</sup></i> |                             |                |                |        |
| TBr_phe1                    | 10.4                        | -57.2          | 107.2          | gauche |
| TBr_pla1                    | 155.3                       | -66.0          | 101.8          | gauche |
| TBr_ter1                    | -57.3                       | -177.6         | 86.0           | anti   |
| TBr_ter2                    | 74.6                        | -163.3         | 94.5           | anti   |
| TBr_zw1                     | 17.6                        | 50.9           | 77.5           | gauche |
| TBr_zw2                     | 0.1                         | -60.6          | 165.2          | gauche |
| <i>[Tyr+I]<sup>-</sup></i>  |                             |                |                |        |
| TI_phe1                     | 10.3                        | -55.9          | 109.2          | gauche |
| TI_pla1                     | 156.3                       | -60.8          | 103.5          | gauche |
| TI_ter1                     | 82.8                        | -168.7         | 86.1           | anti   |
| TI_ter2                     | -59.7                       | -175.2         | 87.3           | anti   |
| TI_zw1                      | 15.6                        | 53.1           | 76.6           | gauche |
| TI_zw2                      | 1.0                         | -67.0          | -180.0         | gauche |

[a]  $\phi_1$  = O1C1C2N dihedral angle.

[b]  $\phi_2$  = NC2C3C1' dihedral angle.

[c]  $\phi_3$  = C2C3C1'C2' dihedral angle.

**Table S4** Thermodynamic data (kJ mol<sup>-1</sup>) for the most stable structures of [nitroTyr+X]<sup>-</sup> (X = Cl, Br, I) adducts calculated at different levels of theory.

|                                  | B3LYP <sup>a</sup> |                  | B3LYP-D3 <sup>a</sup> |                  | MP2//B3LYP <sup>b</sup> |                  |
|----------------------------------|--------------------|------------------|-----------------------|------------------|-------------------------|------------------|
|                                  | H <sub>rel</sub>   | G <sub>rel</sub> | H <sub>rel</sub>      | G <sub>rel</sub> | H <sub>rel</sub>        | G <sub>rel</sub> |
| <i>[nitroTyr+Cl]<sup>-</sup></i> |                    |                  |                       |                  |                         |                  |
| <b>nTCl_pla1</b>                 | 0.0                | 0.0              | 0.0                   | 0.0              | 0.0                     | 0.0              |
| <b>nTCl_ter1</b>                 | 12.8               | 13.2             | 10.9                  | 14.0             | 5.9                     | 6.3              |
| <b>nTCl_pla2</b>                 | 12.6               | 13.4             | 11.4                  | 12.3             | 10.5                    | 11.3             |
| <b>nTCl_ring1</b>                | 26.2               | 28.4             | 17.8                  | 25.8             | 11.4                    | 13.5             |
| <b>nTCl_ter2</b>                 | 19.1               | 20.2             | 18.4                  | 19.9             | 15.7                    | 16.8             |
| <b>nTCl_ter3</b>                 | 12.7               | 15.5             | 16.3                  | 15.7             | 17.9                    | 20.7             |
| <b>nTCl_pla3</b>                 | 20.6               | 23.4             | 18.5                  | 23.3             | 18.6                    | 21.4             |
| <b>nTCl_ter4</b>                 | 12.6               | 15.2             | 14.6                  | 17.5             | 19.0                    | 21.6             |
| <b>nTCl_phe1</b>                 | 32.6               | 29.0             | 38.0                  | 34.4             | 26.7                    | 23.1             |
| <b>nTCl_zw1</b>                  | 27.4               | 30.7             | 24.4                  | 28.3             | 24.4                    | 27.7             |
| <b>nTCl_zw2</b>                  | 23.6               | 23.6             | 24.6                  | 27.0             | 28.3                    | 28.3             |
| <b>nTCl_ring2</b>                | 38.7               | 40.9             | 36.2                  | 39.6             | 30.1                    | 32.3             |
| <b>nTCl_O1</b>                   | 82.7               | 81.3             | 83.1                  | 82.6             | 83.1                    | 81.8             |
| <i>[nitroTyr+Br]<sup>-</sup></i> |                    |                  |                       |                  |                         |                  |
| <b>nTBr_pla1</b>                 | 0.0                | 0.0              | 0.0                   | 0.0              | 0.0                     | 0.0              |
| <b>nTBr_ter1</b>                 | 12.3               | 13.3             | 10.9                  | 13.1             | 8.4                     | 9.3              |
| <b>nTBr_pla2</b>                 | 13.2               | 13.4             | 11.5                  | 11.1             | 11.7                    | 11.9             |
| <b>nTBr_ring1</b>                | 25.6               | 26.7             | 19.9                  | 21.7             | 10.8                    | 12.0             |
| <b>nTBr_ter2</b>                 | 11.3               | 13.2             | 13.4                  | 13.6             | 17.3                    | 19.3             |
| <b>nTBr_phe1</b>                 | 32.2               | 28.6             | 38.0                  | 33.4             | 27.5                    | 23.9             |
| <b>nTBr_zw1</b>                  | 27.1               | 29.9             | 24.8                  | 27.6             | 24.0                    | 26.7             |
| <b>nTBr_zw2</b>                  | 22.6               | 21.9             | 21.4                  | 24.9             | 28.0                    | 27.3             |
| <i>[nitroTyr+I]<sup>-</sup></i>  |                    |                  |                       |                  |                         |                  |
| <b>nTI_pla1</b>                  | 0.0                | 0.0              | 0.0                   | 0.0              | 0.0                     | 0.0              |
| <b>nTI_ter1</b>                  | 10.4               | 7.3              | 9.6                   | 9.5              | 10.2                    | 7.1              |
| <b>nTI_pla2</b>                  | 13.5               | 12.6             | 11.5                  | 10.9             | 9.7                     | 8.8              |
| <b>nTI_ring1</b>                 | 24.8               | 21.7             | 13.8                  | 15.3             | 17.0                    | 13.8             |
| <b>nTI_ter2</b>                  | 10.0               | 11.0             | 12.9                  | 13.4             | 15.0                    | 15.9             |
| <b>nTI_phe1</b>                  | 29.6               | 24.2             | 36.2                  | 31.4             | 23.4                    | 18.0             |
| <b>nTI_zw1</b>                   | 21.5               | 19.9             | 23.4                  | 23.4             | 22.1                    | 20.4             |
| <b>nTI_zw2</b>                   | 25.6               | 26.7             | 23.9                  | 26.0             | 20.3                    | 21.5             |

<sup>a</sup>The basis set 6-311++G(d,p) was employed. <sup>b</sup>Thermal and zero-point energy corrections obtained from B3LYP calculations. The Def2-TZVP ECP was used for the iodine atom together with the 6-311++G(d,p) basis set for lighter atoms.



**TABLE S5** Selected dihedral angles (in Degrees) of the lowest energy structures of [nitroTyr+X]<sup>-</sup> (X = Cl, Br, I) adducts, calculated at the B3LYP/6-311++G(d,p) level of theory.

| Species                          | O1C1C2N NC2C3C1' C2C3C1'C2' |              |              |        |
|----------------------------------|-----------------------------|--------------|--------------|--------|
|                                  | $\phi_1$ [a]                | $\phi_2$ [b] | $\phi_3$ [c] |        |
| <i>[nitroTyr+Cl]<sup>-</sup></i> |                             |              |              |        |
| nTCl_pla1                        | 159.1                       | -66.0        | 101.2        | gauche |
| nTCl_ter1                        | -56.3                       | -178.3       | 96.6         | anti   |
| nTCl_pla2                        | 162.5                       | -62.9        | 81.5         | gauche |
| nTCl_ring1                       | -25.3                       | 62.6         | 84.6         | gauche |
| nTCl_ter2                        | -55.2                       | -175.8       | 69.8         | anti   |
| nTCl_ter3                        | 74.9                        | -166.8       | 67.4         | anti   |
| nTCl_pla3                        | 9.9                         | -59.5        | 109.7        | gauche |
| nTCl_ter4                        | 73.4                        | -163.5       | 99.4         | anti   |
| nTCl_phe1                        | 9.4                         | -60.0        | 104.8        | gauche |
| nTCl_zw1                         | 18.7                        | 48.9         | 92.5         | gauche |
| nTCl_zw2                         | 15.0                        | 61.1         | 70.1         | gauche |
| nTCl_ring2                       | 9.9                         | -59.5        | 109.7        | gauche |
| nTCl_O1                          | 52.5                        | -50.1        | 99.0         | gauche |
| <i>[nitroTyr+Br]<sup>-</sup></i> |                             |              |              |        |
| nTBr_pla1                        | 157.9                       | -63.7        | 102.4        | gauche |
| nTBr_ter1                        | -55.6                       | -179.7       | 94.7         | anti   |
| nTBr_pla2                        | 161.2                       | -61.2        | 79.7         | gauche |
| nTBr_ring1                       | 106.1                       | 62.4         | 83.1         | gauche |
| nTBr_ter2                        | 74.6                        | -165.0       | 98.2         | anti   |
| nTBr_phe1                        | 9.6                         | -60.2        | 105.1        | gauche |
| nTBr_zw1                         | -10.4                       | 65.6         | 86.3         | gauche |
| nTBr_zw2                         | 14.2                        | 59.8         | 71.3         | gauche |
| <i>[nitroTyr+I]<sup>-</sup></i>  |                             |              |              |        |
| nTI_pla1                         | 158.1                       | -59.9        | 103.0        | gauche |
| nTI_ter1                         | -54.0                       | -177.8       | 84.1         | anti   |
| nTI_pla2                         | 159.3                       | -60.6        | 77.5         | gauche |
| nTI_ring1                        | -13.6                       | 61.9         | 81.5         | gauche |
| nTI_ter2                         | 77.6                        | -164.2       | 102.7        | anti   |
| nTI_phe1                         | 14.1                        | 59.4         | 72.3         | gauche |
| nTI_zw1                          | 10.1                        | -60.1        | 106.2        | gauche |
| nTI_zw2                          | -8.6                        | 65.6         | 85.69        | gauche |

[a]  $\phi_1 = \angle O1C1C2N$  dihedral angle.

[b]  $\phi_2 = \angle NC2C3C1'$  dihedral angle.

[c]  $\phi_3 = \angle C2C3C1'C2'$  dihedral angle.

**Table S6** Experimental IRMPD resonances and calculated (at B3LYP/6-311++G(d,p) level of theory) vibrational frequencies for the low-lying isomers of [Tyr+X]<sup>-</sup> (X = Cl, Br, I) adducts.

| <b>[Tyr+Cl]<sup>-</sup></b> |                           |             |             |             |                                 |
|-----------------------------|---------------------------|-------------|-------------|-------------|---------------------------------|
| IRMPD <sup>a</sup>          | Calculated <sup>a,b</sup> |             |             |             | Vibrational mode                |
|                             | TCl_pla1                  | TCl_phe1    | TCl_ter1    | TCl_ter2    |                                 |
| 1105 (low)                  | 1104 (20)                 |             | 1083 (32)   | 1097 (53)   | NH2 wagging                     |
| 1178                        |                           |             |             | 1168 (112)  | CH in plane bend                |
|                             | 1166 (176)                |             | 1168 (172)  | 1171 (77)   | OH phenol bend                  |
|                             | 1194 (47)                 | 1178 (33)   |             | 1197 (66)   | OH carboxyl bend + NH2 wagging  |
| 1250                        |                           | 1250 (37)   |             | 1223 (57)   | OH phenol bend                  |
|                             | 1230 (64)                 |             | 1232 (90)   | 1233 (80)   | ring def                        |
|                             | 1270 (21)                 |             |             |             | NH2 twist                       |
| 1312                        |                           | 1293 (238)  | 1307 (45)   |             | ring def                        |
| 1358                        | 1336 (22)                 |             |             |             | CH in plane bend                |
|                             | 1352 (293)                |             | 1329 (159)  | 1337 (96)   | OH carboxyl bend                |
|                             |                           |             | 1334 (138)  |             | OH carboxyl bend+OH phenol bend |
|                             |                           |             |             | 1365 (168)  | COO-H bend + NH2 twisting       |
| 1376                        |                           | 1378 (32)   |             |             | OH phenol bend                  |
|                             | 1395 (60)                 |             | 1355 (46)   | 1379 (102)  | CH bend                         |
|                             |                           | 1397 (474)  |             |             | OH carboxyl bend                |
| 1451 (shoulder)             |                           | 1447 (46)   |             |             | OH phenol bend                  |
| 1507                        | 1507 (132)                | 1509 (185)  | 1507 (113)  | 1506 (120)  | CH in plane bend                |
| 1608                        | 1615 (26)                 | 1610 (190)  | 1626 (26)   | 1615 (29)   | ring def                        |
|                             | 1633 (35)                 | 1627 (22)   |             |             | NH2 scissor                     |
| 1720                        | 1713 (442)                |             | 1714 (364)  | 1706 (368)  | C=O stretch                     |
| 1790                        |                           | 1781 (389)  |             |             | C=O stretch                     |
|                             | 2710 (1871)               |             | 2850 (1705) | 2759 (1879) | OH carboxyl stretch             |
|                             |                           | 2751 (2962) |             |             | OH phenol stretch               |
|                             |                           |             | 2918 (38)   |             | CH stretch                      |
|                             | 2898 (32)                 | 2884 (29)   |             |             | CH2 symm stretch                |
|                             | 2994 (44)                 | 2998 (21)   |             | 2994 (32)   | CH asymm stretch                |
| 3008                        | 3004 (42)                 |             | 3005 (29)   |             | CH symm stretch                 |
| 3060                        | 3046 (21)                 | 3037 (32)   |             |             | CH symm stretch                 |
| 3200 (broad)                |                           | 3242 (343)  |             |             | OH carboxyl stretch             |
| 3272                        |                           |             | 3239 (218)  | 3242 (209)  | NH2 symm stretch                |
| 3330                        |                           |             | 3381 (20)   | 3368 (25)   | NH2 asymm stretch               |
| 3663                        | 3676 (45)                 |             | 3680 (48)   | 3671 (47)   | OH phenol stretch               |

| <b>[Tyr+Br]<sup>-</sup></b> |                           |           |           |           |                  |
|-----------------------------|---------------------------|-----------|-----------|-----------|------------------|
| IRMPD <sup>a</sup>          | Calculated <sup>a,b</sup> |           |           |           | Vibrational mode |
|                             | TBr_phe1                  | TBr_pla1  | TBr_ter1  | TBr_ter2  |                  |
| 1104 (low)                  |                           | 1103 (20) | 1081 (29) | 1096 (50) | NH2 wag          |

|                 |             |             |             |             |                                   |
|-----------------|-------------|-------------|-------------|-------------|-----------------------------------|
| 1177            |             | 1166 (173)  | 1168 (183)  | 1168 (192)  | OH phenol bend                    |
|                 | 1170 (26)   |             |             |             | CH in plane bend                  |
|                 | 1179 (28)   |             |             |             | OH carboxyl bend + NH2 wagging    |
| 1204            |             | 1189 (66)   |             | 1191 (70)   | CH bend                           |
| 1242            | 1243 (60)   |             |             |             | OH phenol bend                    |
|                 |             | 1232 (63)   | 1233 (91)   | 1233 (85)   | ring def                          |
| 1295            | 1287 (224)  |             |             |             | ring def                          |
| 1333            |             | 1328 (42)   | 1307 (63)   | 1299 (62)   | OH carboxyl bend + CH2 wagging    |
|                 |             | 1337 (33)   |             | 1331 (34)   | OH phenol bend + CH in plane bend |
|                 |             | 1341 (268)  | 1328 (243)  | 1324 (148)  | OH carboxyl bend                  |
|                 |             |             | 1333 (45)   |             | OH phenol bend + CH in plane bend |
| 1375 (shoulder) |             |             |             | 1357 (127)  | OH carboxyl bend + CH bend        |
|                 | 1367 (26)   |             |             |             | OH phenol bend + CH in plane bend |
|                 |             | 1396 (41)   | 1358 (32)   | 1378 (46)   | CH bend                           |
|                 | 1397 (476)  |             |             |             | OH carboxyl bend                  |
| 1447 (low)      | 1442 (33)   |             |             |             | OH phenol bend + ring def         |
| 1508            | 1511 (180)  | 1508 (127)  | 1507 (116)  | 1506 (120)  | CH in plane bend                  |
| 1602            | 1611 (178)  | 1615 (28)   | 1616 (27)   | 1615 (30)   | ring def                          |
| 1729            |             | 1718 (439)  | 1719 (371)  | 1712 (372)  | C=O stretch                       |
| 1775            | 1781 (388)  |             |             |             | C=O stretch                       |
| 2841            | 2880 (42)   | 2892 (26)   | 2898 (22)   | 2906 (25)   | CH2 symm stretch                  |
| 2921            | 2929 (2685) |             |             |             | OH phenol stretch                 |
|                 |             |             | 2913 (36)   | 2922 (352)  | CH stretch                        |
|                 |             |             | 2942 (25)   |             | CH2 asymm stretch                 |
|                 |             | 2904 (1784) | 2976 (1663) | 2930 (1538) | OH carboxyl stretch               |
|                 |             | 2931 (47)   |             |             | CH stretch                        |
| 3022 (broad)    | 2994 (27)   | 2992 (47)   | 3000 (27)   | 2994 (30)   | CH asymm stretch                  |
|                 | 3033 (67)   | 3002 (39)   |             |             | CH symm stretch                   |
|                 |             | 3040 (21)   |             |             | CH symm stretch                   |
| 3251 (broad)    | 3236 (345)  |             |             |             | OH carboxyl stretch               |
|                 |             |             | 3238 (240)  | 3245 (242)  | NH2 symm stretch                  |
| 3331            |             | 3314 (5)    |             |             | NH2 symm stretch                  |
| 3400            | 3412 (10)   | 3392 (7)    | 3378 (20)   | 3371 (27)   | NH2 asymm stretch                 |
| 3664            |             | 3667 (46)   | 3672 (48)   | 3670 (48)   | OH phenol stretch                 |

| <b>[Tyr+I]<sup>-</sup></b> |                           |            |            |            |                                     |
|----------------------------|---------------------------|------------|------------|------------|-------------------------------------|
| IRMPD <sup>a</sup>         | Calculated <sup>a,b</sup> |            |            |            | Vibrational mode                    |
|                            | TI_phe1                   | TI_pla1    | TI_ter1    | TI_ter2    |                                     |
| 1090 (low)                 |                           | 1092 (20)  | 1078 (26)  | 1089 (38)  | NH2 wag + CH in plane bend          |
| 1177                       | 1171 (24)                 |            |            | 1166 (71)  | CH in plane bend                    |
|                            |                           | 1166 (164) | 1168 (189) | 1170 (114) | OH bend                             |
|                            | 1181 (38)                 |            |            |            | OH carboxyl bend + NH2 wagging      |
|                            |                           | 1189 (78)  |            | 1183 (101) | CH bend                             |
| 1239 (shoulder)            |                           |            | 1223 (77)  |            | OH carboxyl bend + NH2 wagging      |
|                            | 1228 (80)                 |            |            |            | OH phenol bend                      |
|                            |                           | 1231 (79)  | 1234 (79)  | 1234 (91)  | ring def                            |
| 1288                       |                           |            | 1289 (256) |            | OH carboxyl bend + CH in plane bend |
|                            | 1284 (210)                |            |            |            | ring def                            |
| 1323                       | 1353 (29)                 |            |            |            | OH phenol bend + CH in plane bend   |

|      |            |            |            |            |                                     |
|------|------------|------------|------------|------------|-------------------------------------|
|      |            | 1320 (34)  | 1314 (51)  | 1329 (45)  | OH carboxyl bend + CH in plane bend |
|      |            | 1328 (257) |            | 1333 (120) | OH carboxyl bend                    |
|      |            | 1339 (44)  |            |            | CH <sub>2</sub> wag                 |
|      |            |            | 1356 (26)  | 1365 (141) | CH bend                             |
| 1382 | 1399 (479) |            |            |            | OH carboxyl bend                    |
|      |            | 1400 (33)  |            | 1381 (35)  | NH <sub>2</sub> twist               |
| 1517 | 1513 (175) | 1507 (120) | 1508 (119) | 1504 (116) | CH in plane bend                    |
| 1608 | 1613 (160) | 1614 (33)  | 1616 (28)  | 1614 (33)  | ring def                            |
|      |            | 1632 (35)  |            |            | NH <sub>2</sub> scissor             |
| 1750 |            | 1728 (440) | 1731 (375) | 1724 (368) | C=O stretch                         |
| 1785 | 1783 (386) |            |            |            | C=O stretch                         |

<sup>a</sup> In  $\text{cm}^{-1}$ . <sup>b</sup> The reported intensities given in parentheses are in  $\text{km mol}^{-1}$ . Bands with an intensity lower than  $20 \text{ km mol}^{-1}$  are usually not included. Frequencies are scaled by a factor of 0.978 in the  $1000\text{-}2000 \text{ cm}^{-1}$  region and 0.955 in the  $2800\text{-}3800 \text{ cm}^{-1}$  region.

**Table S7** Experimental IRMPD resonances and calculated (at B3LYP/6-311++G(d,p) level of theory) vibrational frequencies for the low-lying isomers of [nitroTyr+X]<sup>-</sup> (X = Cl, Br, I) adducts.

| <b>[nitroTyr+Cl]<sup>-</sup></b> |                           |            |            |                                                      |
|----------------------------------|---------------------------|------------|------------|------------------------------------------------------|
| IRMPD <sup>a</sup>               | Calculated <sup>a,b</sup> |            |            | Vibrational mode                                     |
|                                  | nTCl_pla1                 | nTCl_ter1  | nTCl_ring1 |                                                      |
|                                  |                           |            | 1001 (43)  | NH2 wag                                              |
|                                  | 1083 (25)                 | 1079 (42)  | 1079 (28)  | ring def + NO2 symm stretch                          |
|                                  | 1147 (37)                 | 1133 (24)  | 1134 (40)  | CH in plane bend + NH2 twist                         |
| 1220                             | 1191 (73)                 | 1191 (64)  | 1197 (47)  | CH in plane bend + OH phenol bend                    |
|                                  | 1207 (305)                | 1211 (247) | 1216 (197) | C-N stretch + CH in plane bend                       |
| 1330                             |                           | 1247 (33)  | 1241 (27)  | OH carboxyl bend                                     |
|                                  | 1252 (140)                | 1253 (113) | 1249 (125) | OH phenol bend + CH in plane bend + NO2 symm stretch |
|                                  |                           |            | 1281 (132) | CH bend                                              |
|                                  | 1280 (341)                | 1284 (302) | 1291 (237) | OH phenol bend                                       |
|                                  | 1294 (29)                 | 1313 (33)  |            | CH2 twist                                            |
|                                  | 1341 (100)                |            |            | ring def                                             |
|                                  | 1357 (218)                | 1324 (271) | 1316 (250) | OH carboxyl bend                                     |
|                                  |                           | 1339 (55)  | 1337 (128) | OH carboxyl bend + CH2 twist                         |
|                                  |                           | 1344 (135) |            | CH2 wag                                              |
|                                  | 1392 (73)                 |            |            | NH2 twist                                            |
| 1423                             | 1422 (184)                | 1422 (159) | 1426 (165) | NO2 asymm stretch + OH phenol bend                   |
| 1474                             | 1482 (172)                | 1485 (140) | 1487 (116) | NO2 asymm stretch + CH in plane bend                 |
| 1528                             | 1530 (271)                | 1531 (273) | 1533 (245) | NO2 asymm stretch + ring def                         |
| 1572                             |                           |            | 1584 (41)  | ring def                                             |
| 1610                             | 1625 (76)                 | 1627 (74)  | 1630 (59)  | ring def                                             |
| 1710                             | 1720 (448)                | 1715 (360) | 1698 (415) | C=O stretch                                          |
| <b>[nitroTyr+Br]<sup>-</sup></b> |                           |            |            |                                                      |
| IRMPD <sup>a</sup>               | Calculated <sup>a,b</sup> |            |            | Vibrational mode                                     |
|                                  | nTBr_pla1                 | nTBr_ter1  | nTBr_ring1 |                                                      |
|                                  | 1083 (26)                 | 1079 (43)  | 1079 (28)  | ring def + NO2 sym stretch                           |
|                                  | 1147 (40)                 | 1133 (24)  | 1134 (41)  | CH in plane bend + NH2 twist                         |
| 1197                             | 1188 (31)                 |            | 1163 (29)  | CH bend                                              |
|                                  | 1193 (55)                 | 1191 (65)  | 1192 (31)  | CH in plane bend + OH phenol bend                    |
|                                  |                           | 1204 (82)  |            | CH2 wag + NH2 twist                                  |
| 1214                             | 1208 (293)                | 1211 (169) | 1213 (210) | C-N stretch + CH in plane bend                       |

|      |            |            |            |                                                      |
|------|------------|------------|------------|------------------------------------------------------|
| 1257 |            | 1240 (27)  | 1228 (39)  | OH carboxyl bend                                     |
|      | 1252 (120) | 1253 (126) | 1250 (133) | OH phenol bend + CH in plane bend + NO2 symm stretch |
|      |            |            | 1282 (151) | CH bend + CH2 twist                                  |
|      | 1279 (295) | 1284 (297) |            | OH phenol bend                                       |
|      | 1292 (72)  |            | 1292 (223) | CH2 twist                                            |
| 1323 | 1326 (47)  |            |            | CH2 wag                                              |
|      | 1337 (107) | 1314 (315) | 1307 (237) | OH carboxyl bend                                     |
|      |            | 1318 (55)  |            | OH carboxyl bend + CH2 wag                           |
|      | 1340 (214) | 1347 (109) | 1337 (110) | OH carboxyl bend + CH2 twist                         |
|      | 1394 (46)  |            |            | NH2 twist                                            |
| 1437 | 1422 (180) | 1422 (156) | 1426 (159) | NO2 asym stretch + OH phenol bend                    |
| 1487 | 1484 (166) | 1484 (147) | 1487 (115) | NO2 asym stretch + CH in plane bend                  |
| 1538 | 1531 (267) | 1531 (270) | 1534 (242) | NO2 asym stretch + ring def                          |
| 1579 | 1581 (44)  | 1581 (38)  | 1583 (39)  | ring def                                             |
| 1618 | 1625 (83)  | 1627 (76)  | 1630 (58)  | ring def                                             |
|      | 1630 (31)  |            | 1638 (66)  | NH2 scissor                                          |
| 1698 |            |            | 1705 (414) | C=O stretch                                          |
| 1733 | 1726 (450) | 1720 (365) |            | C=O stretch                                          |

### [nitroTyr+I]<sup>-</sup>

| IRMPD <sup>a</sup> | Calculated <sup>a,b</sup> |            |            | Vibrational mode                                     |
|--------------------|---------------------------|------------|------------|------------------------------------------------------|
|                    | nTI_pla1                  | nTI_ter1   | nTI_ring1  |                                                      |
|                    | 1083 (27)                 | 1078 (39)  | 1077 (29)  | ring def + NO2 symm stretch                          |
|                    |                           |            | 1133 (38)  | CH in plane bend                                     |
|                    | 1147 (43)                 |            | 1159 (23)  | CH in plane bend + NH2 twist                         |
| 1198               | 1187 (45)                 |            |            | CH bend                                              |
|                    |                           | 1187 (45)  | 1195 (33)  | OH carboxyl bend                                     |
|                    | 1195 (46)                 | 1193 (49)  |            | CH in plane bend + OH phenol bend                    |
|                    | 1211 (294)                | 1213 (229) | 1215 (179) | C-N stretch + CH in plane bend                       |
| 1253               |                           | 1221 (54)  |            | OH carboxyl bend + NH2 twist                         |
|                    | 1251 (124)                | 1252 (145) | 1251 (133) | OH phenol bend + CH in plane bend + NO2 symm stretch |
|                    |                           |            | 1281 (64)  | CH bend + CH2 twist                                  |
|                    | 1285 (345)                | 1283 (155) | 1291 (300) | OH phenol bend                                       |
| 1316               | 1300 (30)                 |            |            | CH2 twist                                            |
|                    |                           | 1291 (480) | 1300 (308) | OH carboxyl bend                                     |
|                    | 1326 (265)                |            |            | OH carboxyl bend + CH2 wag                           |

|      |            |            |            |                                      |
|------|------------|------------|------------|--------------------------------------|
|      | 1335 (30)  |            | 1337 (103) | OH carboxyl bend + CH2 twist         |
|      | 1343 (80)  | 1341 (114) |            | CH2 wag                              |
|      |            |            | 1381 (22)  | OH phenol bend + ring def            |
| 1403 | 1397 (33)  |            |            | NH2 twist                            |
| 1431 | 1424 (187) | 1423 (146) | 1426 (144) | NO2 asymm stretch + OH phenol bend   |
| 1488 | 1484 (167) | 1485 (151) | 1487 (117) | NO2 asymm stretch + CH in plane bend |
| 1540 | 1530 (254) | 1532 (264) | 1536 (241) | NO2 asymm stretch + ring def         |
| 1580 | 1581 (50)  | 1581 (37)  | 1581 (36)  | ring def                             |
| 1621 | 1626 (88)  | 1628 (83)  | 1631 (108) | ring def                             |
|      | 1633 (33)  |            | 1624 (62)  | NH2 scissor                          |
| 1705 |            |            | 1716 (383) | C=O stretch                          |
| 1743 | 1733 (439) | 1729 (364) |            | C=O stretch                          |

<sup>a</sup> In  $\text{cm}^{-1}$ . <sup>b</sup> The reported intensities given in parentheses are in  $\text{km mol}^{-1}$ . Bands with an intensity lower than  $20 \text{ km mol}^{-1}$  are not included. Frequencies are scaled by a factor of 0.978.
